# Supplementary material for: Can the extinction risk of Irish vascular plants be predicted using leaf traits?
Source: Springer Nature journal article supplement (doi:10.1007/s10531-022-02477-8), 2022-10-26
Supplement: MOESM1 [file 23644614]

1 **Supplementary Material 1**

2 Supplementary material includes: Table of observed and expected values for the trait  
3 'Regularity of Teeth' for six Red List categories; table of year of collection of herbarium  
4 material divided by six Red List categories; stacked bar charts and boxplots of leaf traits for  
5 six Red List categories; 95% confidence intervals for the difference in proportions of the sub-  
6 categories of 'Regularity of Teeth' for each Red List category pair; stressplot for the nMDS  
7 ordination; and images of the 14 taxa photographed at the National Botanic Gardens,  
8 Glasnevin.

9

10 Can the extinction risk of Irish vascular plants be predicted using leaf traits?

11 Biodiversity and Conservation

12 Harrison O'Rourke<sup>1\*</sup>, Eimear Nic Lughadha<sup>2</sup>, and Karen L. Bacon<sup>1</sup>

13 <sup>1</sup> Botany & Plant Sciences, Natural Sciences, National University of Ireland, Galway, Ireland

14 <sup>2</sup> Conservation Science Department, Royal Botanic Gardens, Kew, Richmond, UK

15 \* corresponding author (h.orourke2@nuigalway.ie)

16

17

18

19

20 Table S1. The number of observed values for the trait 'Regularity of Teeth' (top); and the  
 21 number of expected values if there was no association between 'Regularity of Teeth' and  
 22 extinction risk (bottom).

| Observed                 |      |       |       |       |       |        |
|--------------------------|------|-------|-------|-------|-------|--------|
|                          | RE   | CR    | EN    | VU    | NT    | LC     |
| No Teeth                 | 12   | 11    | 18    | 41    | 75    | 596    |
| Regularly Spaced Teeth   | 0    | 1     | 2     | 8     | 7     | 121    |
| Irregularly Spaced Teeth | 1    | 7     | 5     | 5     | 8     | 111    |
| Expected                 |      |       |       |       |       |        |
| No Teeth                 | 9.51 | 13.90 | 18.29 | 39.52 | 65.86 | 605.91 |
| Regularly Spaced Teeth   | 1.76 | 2.57  | 3.38  | 7.29  | 12.16 | 111.85 |
| Irregularly Spaced Teeth | 1.73 | 2.53  | 3.33  | 7.19  | 11.98 | 110.24 |

23

24 Table S2. Mean year in which the herbarium samples were collected, divided by Red List  
 25 category.

| Red List Category     | Mean ( $\pm$ SD)       |
|-----------------------|------------------------|
| Regionally Extinct    | 1916 ( $\pm$ 50.25)    |
| Critically Endangered | 1923.84 ( $\pm$ 38.84) |
| Endangered            | 1917.92 ( $\pm$ 41.58) |
| Vulnerable            | 1930.89 ( $\pm$ 40.31) |
| Near Threatened       | 1929.76 ( $\pm$ 49.02) |
| Least Concern         | 1943.29 ( $\pm$ 45.32) |

26

27

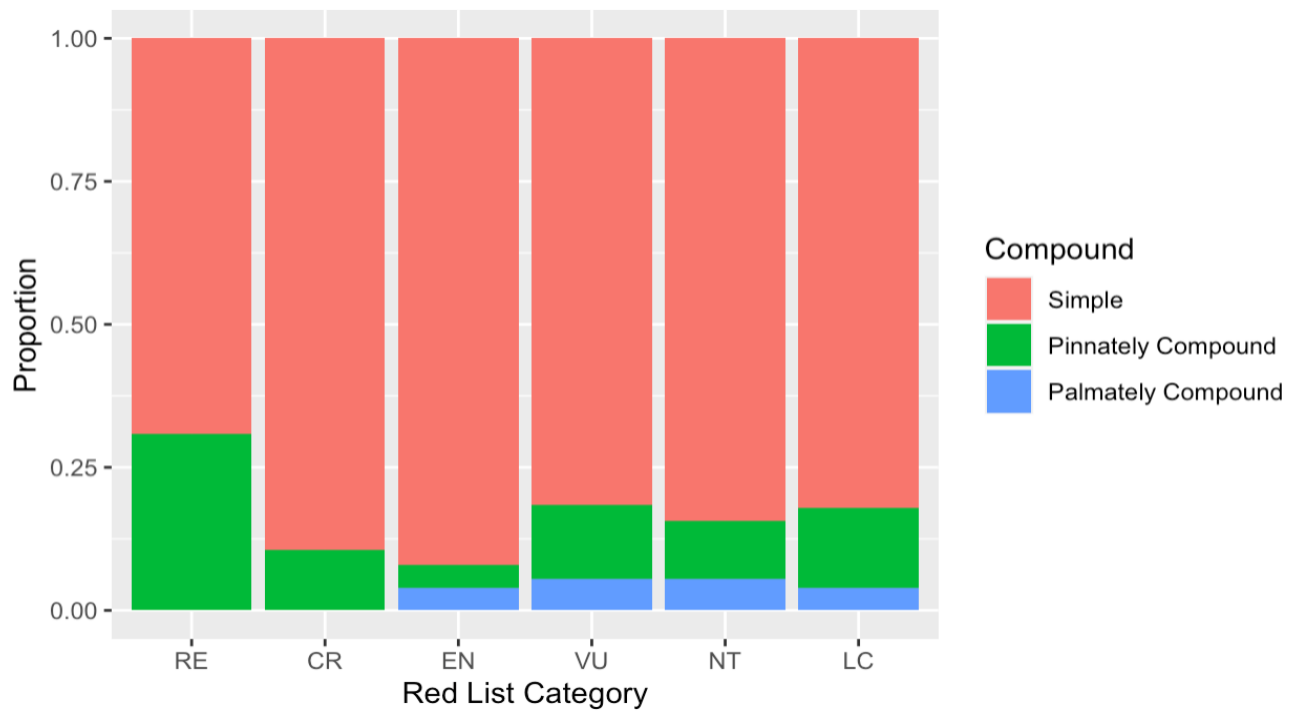

28

29 **Fig. S1** Stacked bar chart of the proportion of compound leaves for the Irish flora divided

30 into six extinction risk categories

31

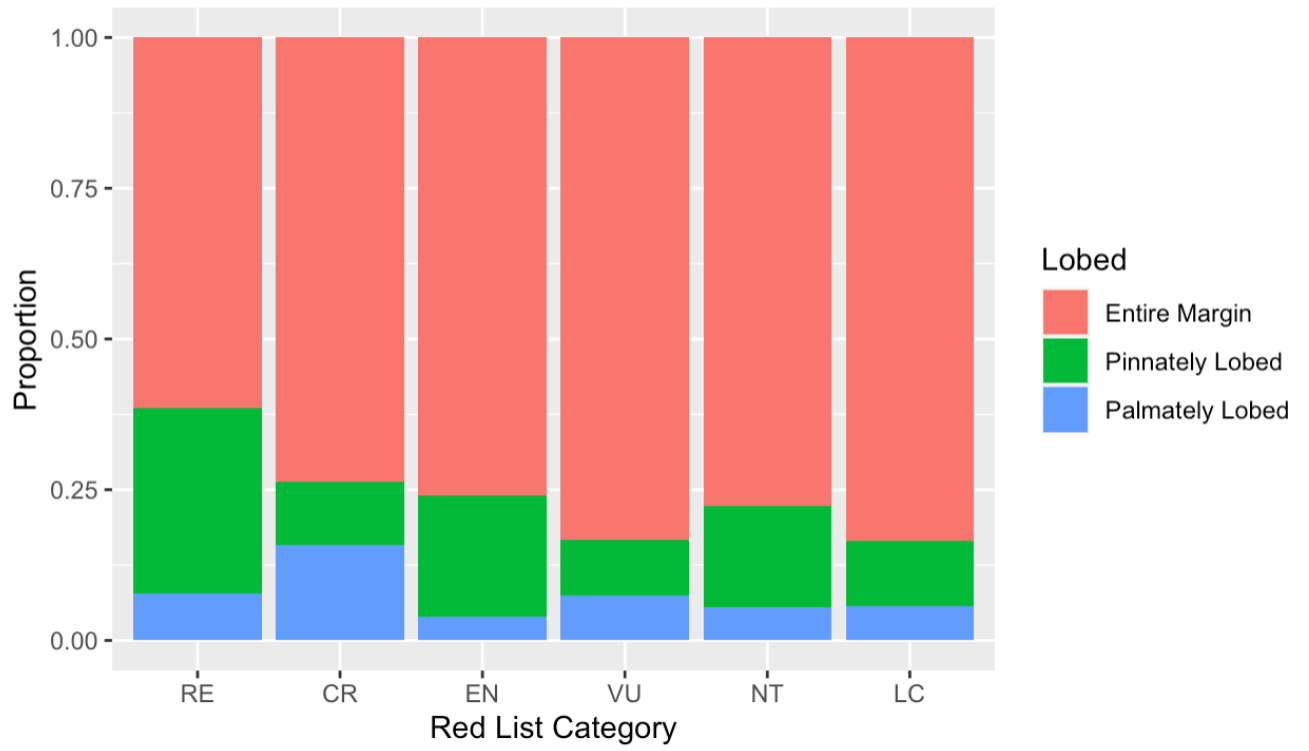

32

33 **Fig. S2** Stacked bar chart of the proportion of lobed leaves for the Irish flora divided into six

34 extinction risk categories

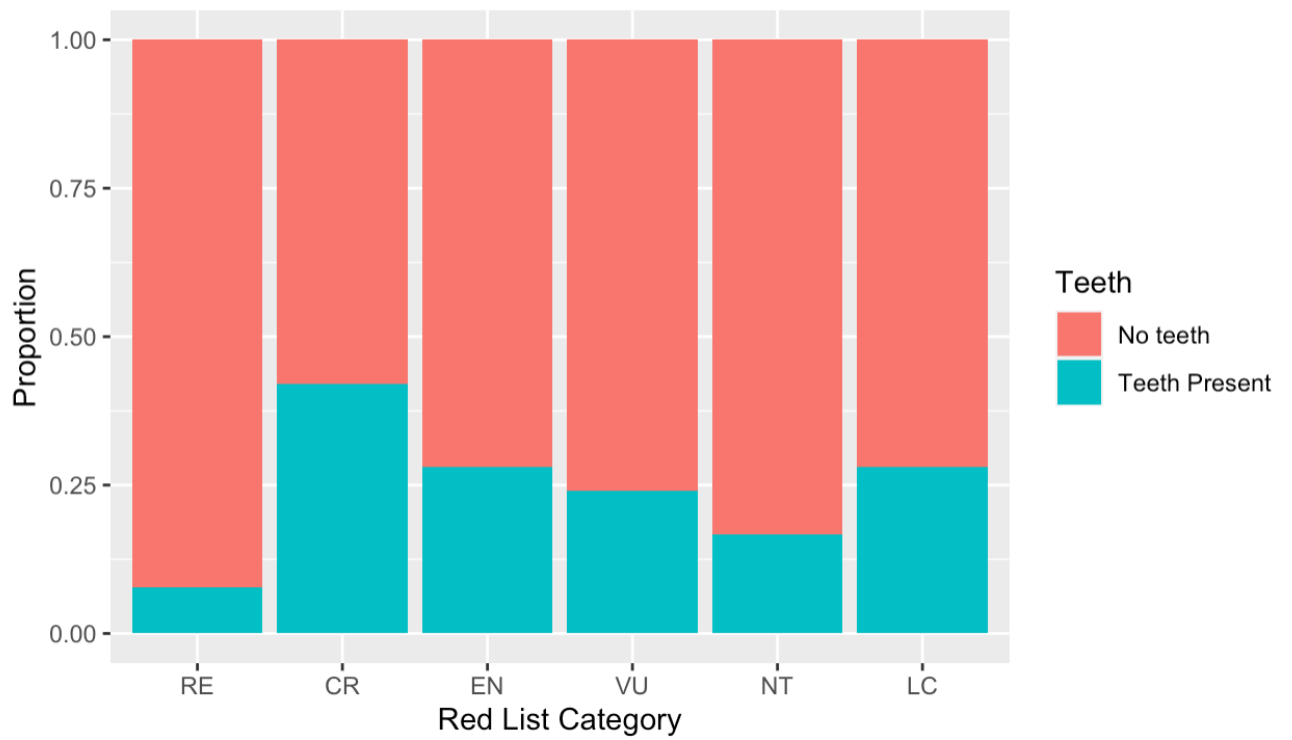

35

36 **Fig. S3** Stacked bar chart of the proportion of toothed leaves for the Irish flora divided into

37 six extinction risk categories

38

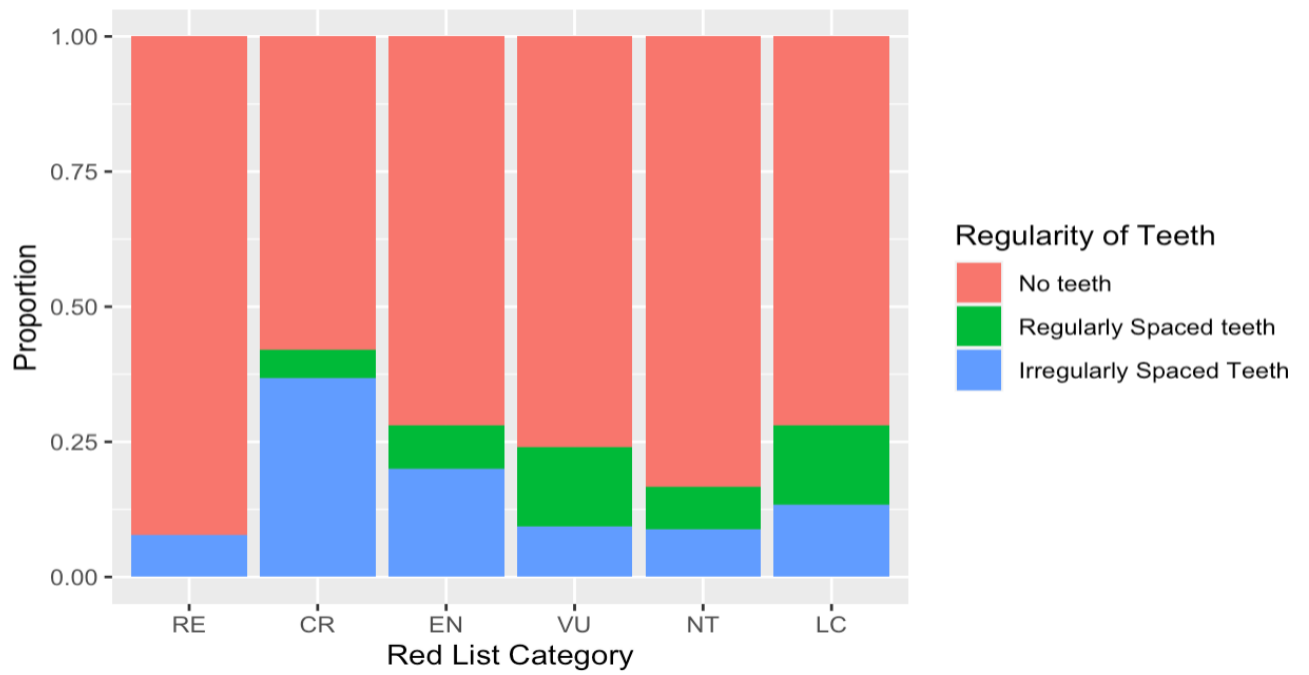

39

40 **Fig. S4** Stacked bar chart of the proportion of regularly spaced leaf teeth for the Irish flora

41 divided into six extinction risk categories

42

43

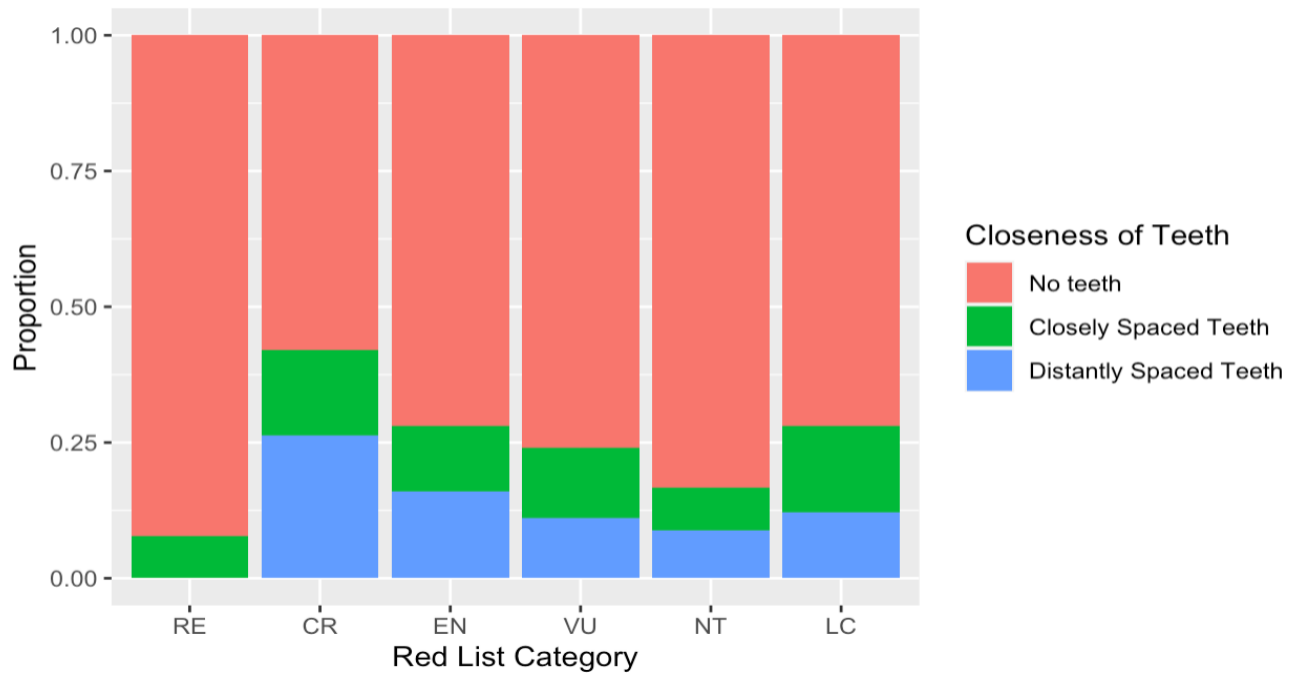

44

45 **Fig. S5** Stacked bar chart of the proportion of closely spaced leaf teeth for the Irish flora

46 divided into six extinction risk categories

47

48

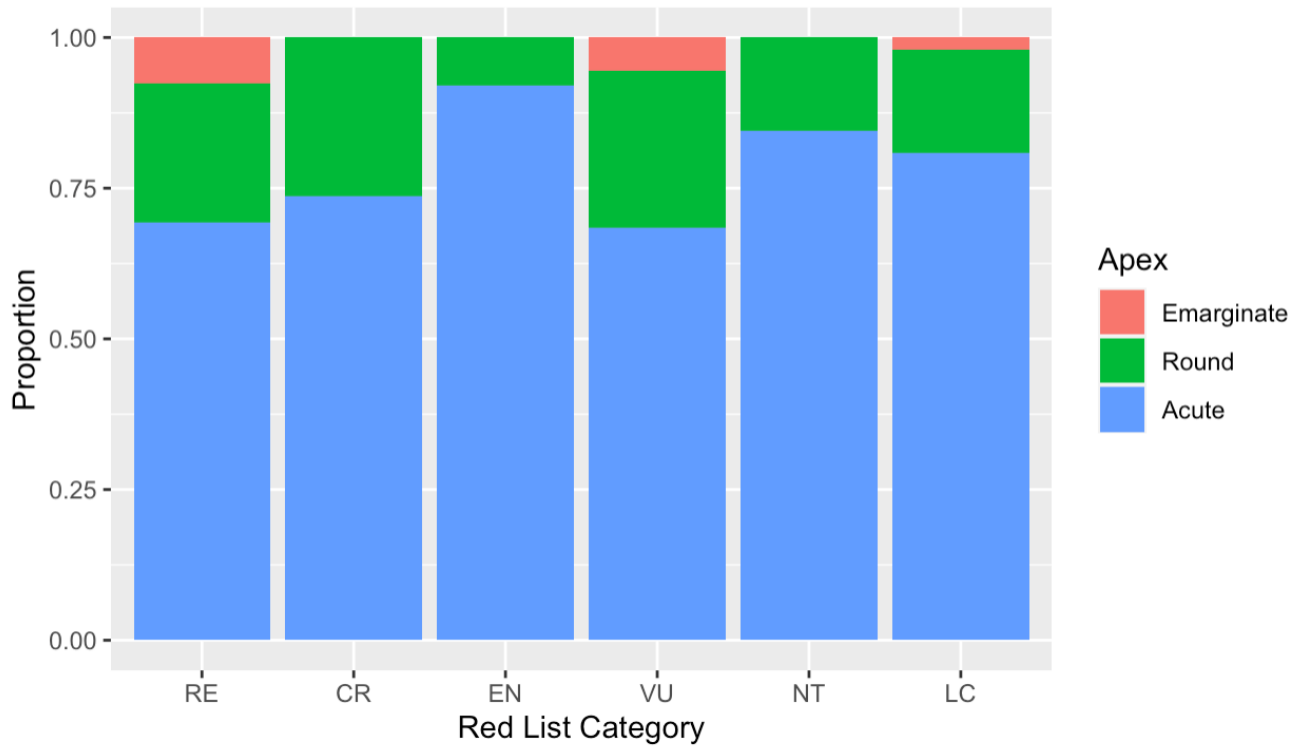

49

50 **Fig. S6** Stacked bar chart of the proportion of leaf apex for the Irish flora divided into six

51 extinction risk categories

52



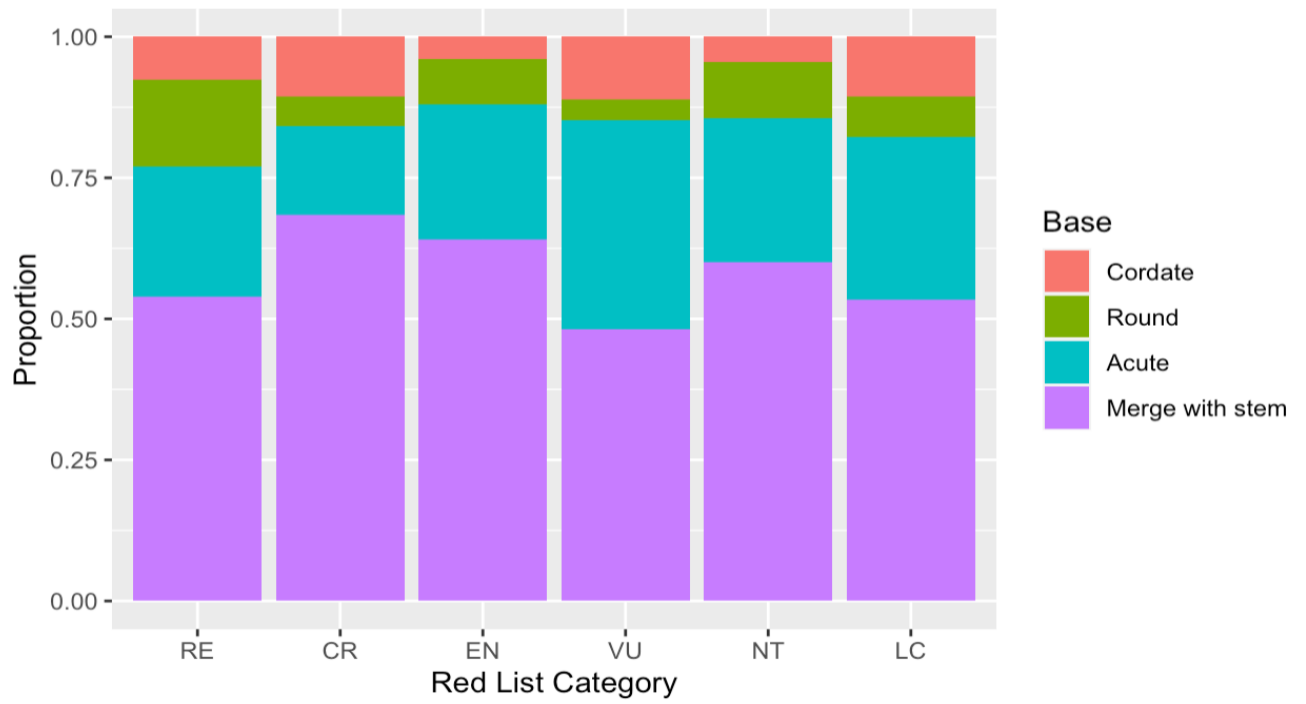

53

54 **Fig. S7** Stacked bar chart of the proportion of leaf base for the Irish flora divided into six

55 extinction risk categories

56

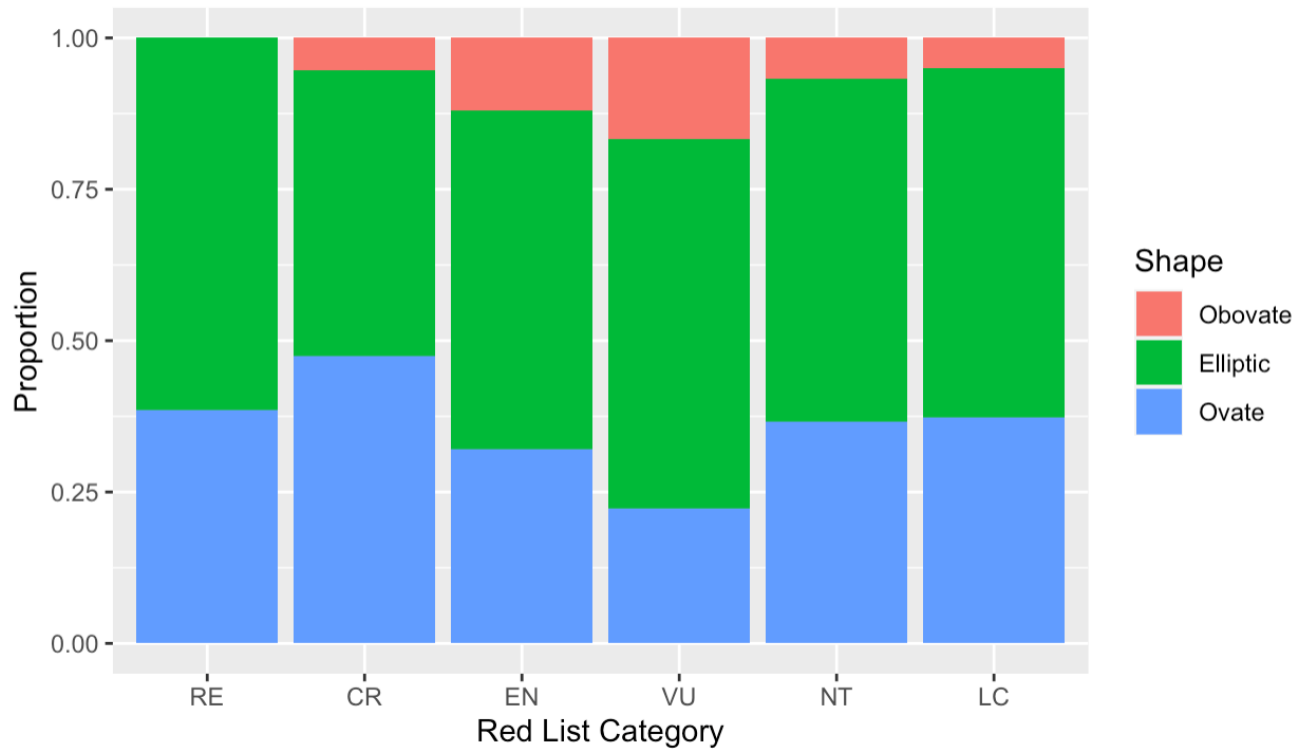

57

58 **Fig. S8** Stacked bar chart of the proportion of leaf shape for the Irish flora divided into six  
 59 extinction risk categories

60

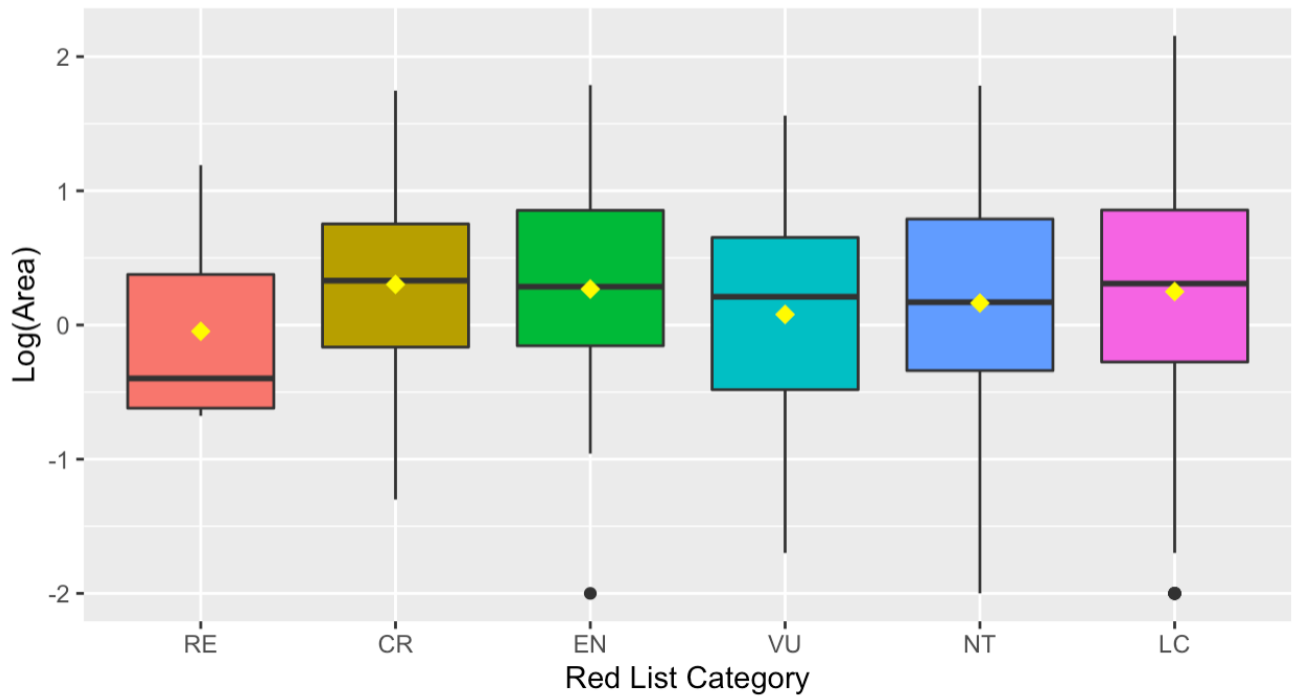

61

62 **Fig. S9** Boxplot of the log leaf area for the Irish flora divided into six extinction risk

63 categories (mean symbol superimposed, yellow diamond)

64

65

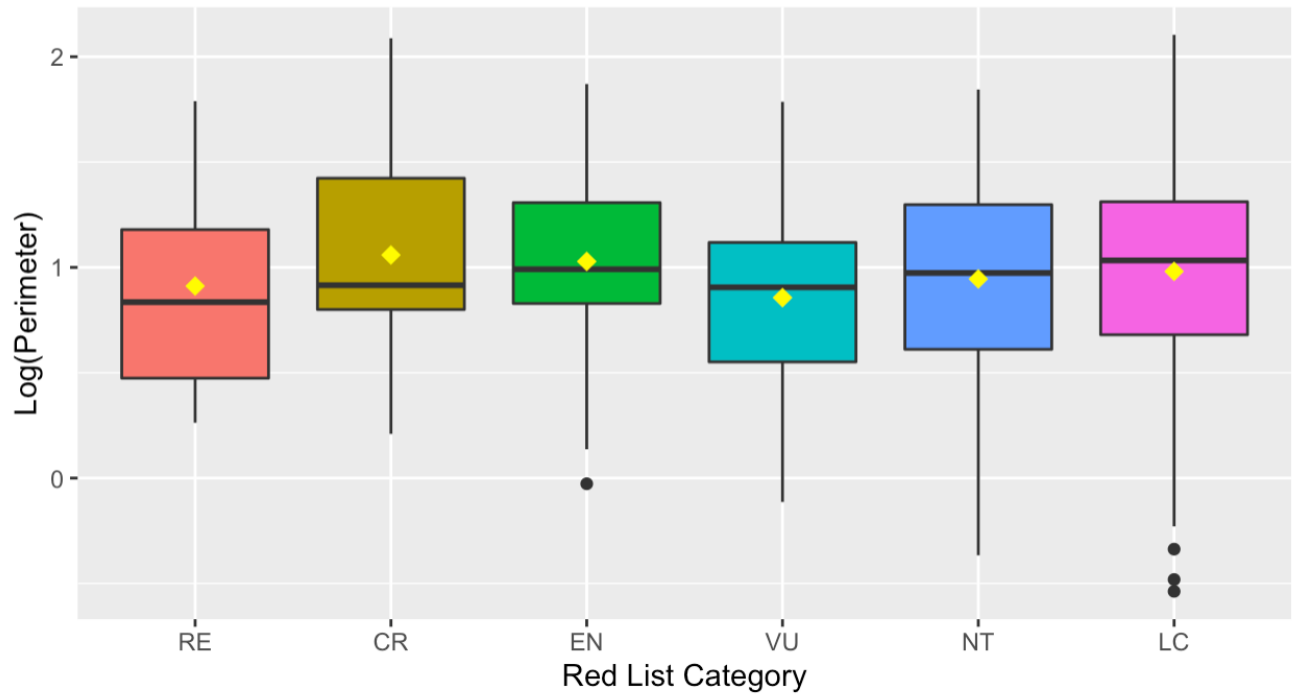

66

67 **Fig. S10** Boxplot of the log leaf perimeter for the Irish flora divided into six extinction risk  
68 categories (mean symbol superimposed, yellow diamond)

69

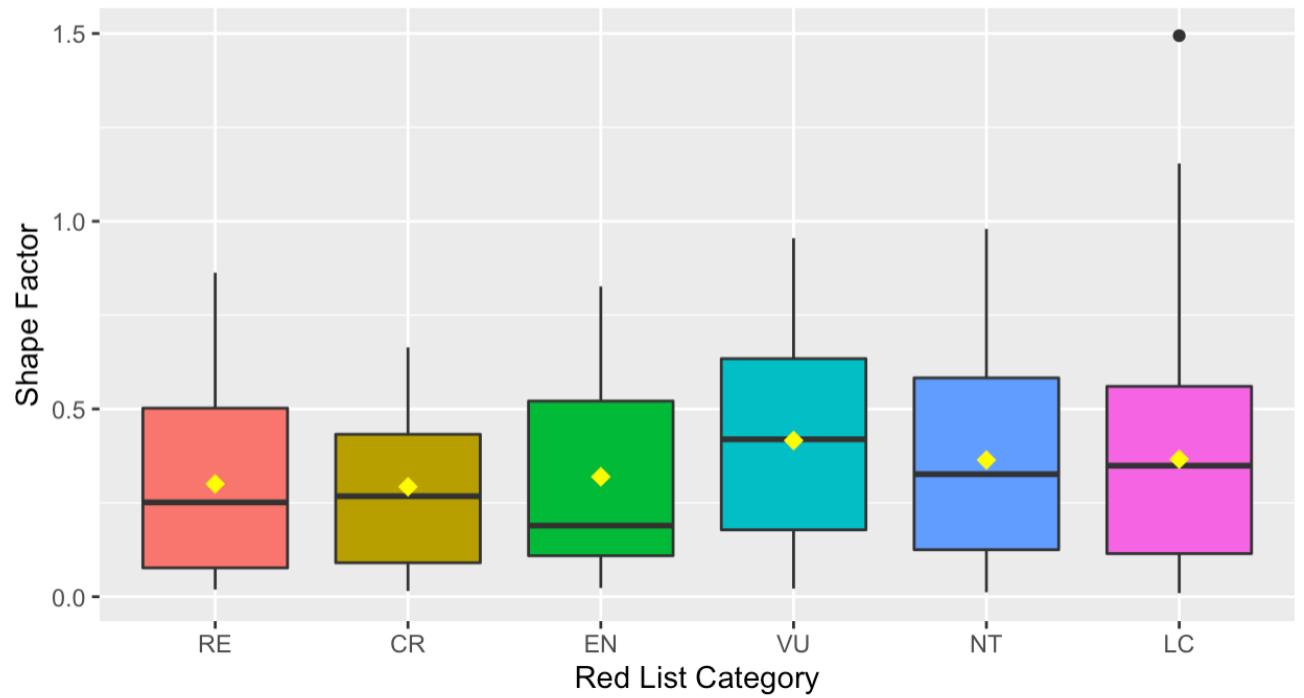

70

71 **Fig. S11** Boxplot of the leaf shape factor for the Irish flora divided into six extinction risk  
72 categories (mean symbol superimposed, yellow diamond)

73

74

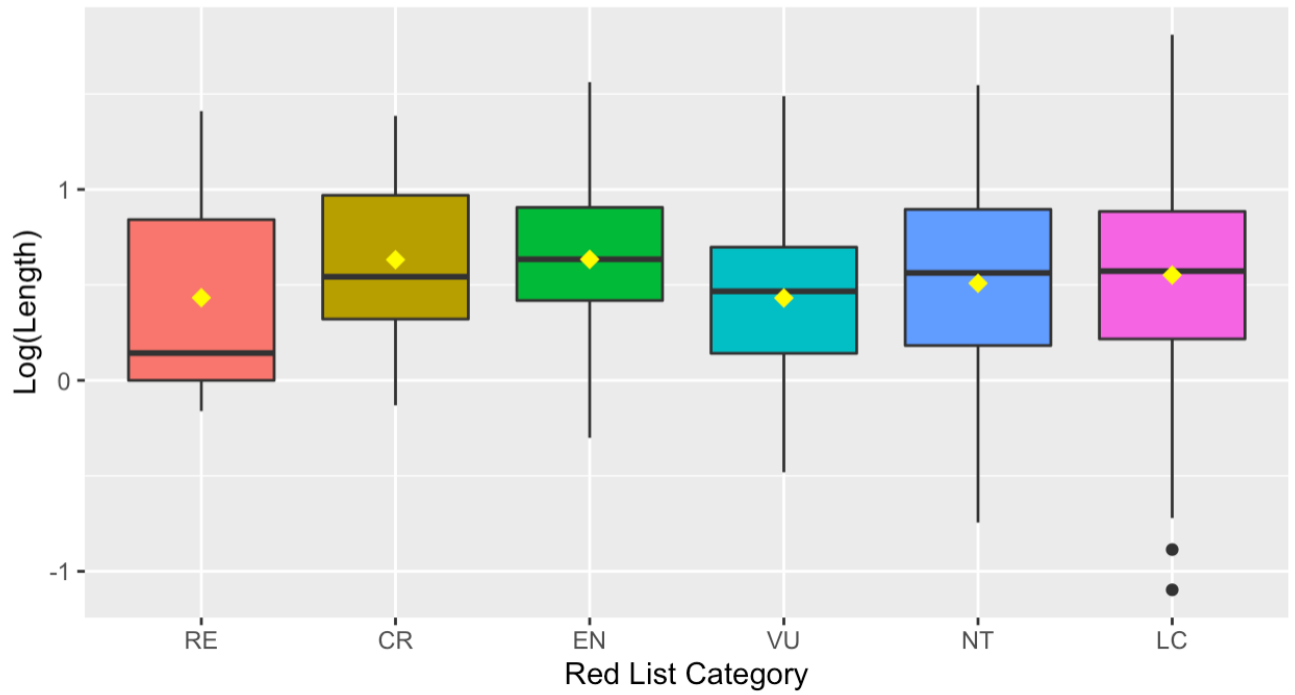

75

76 **Fig. S12** Boxplot of the log leaf length for the Irish flora divided into six extinction risk  
77 categories (mean symbol superimposed, yellow diamond)

78

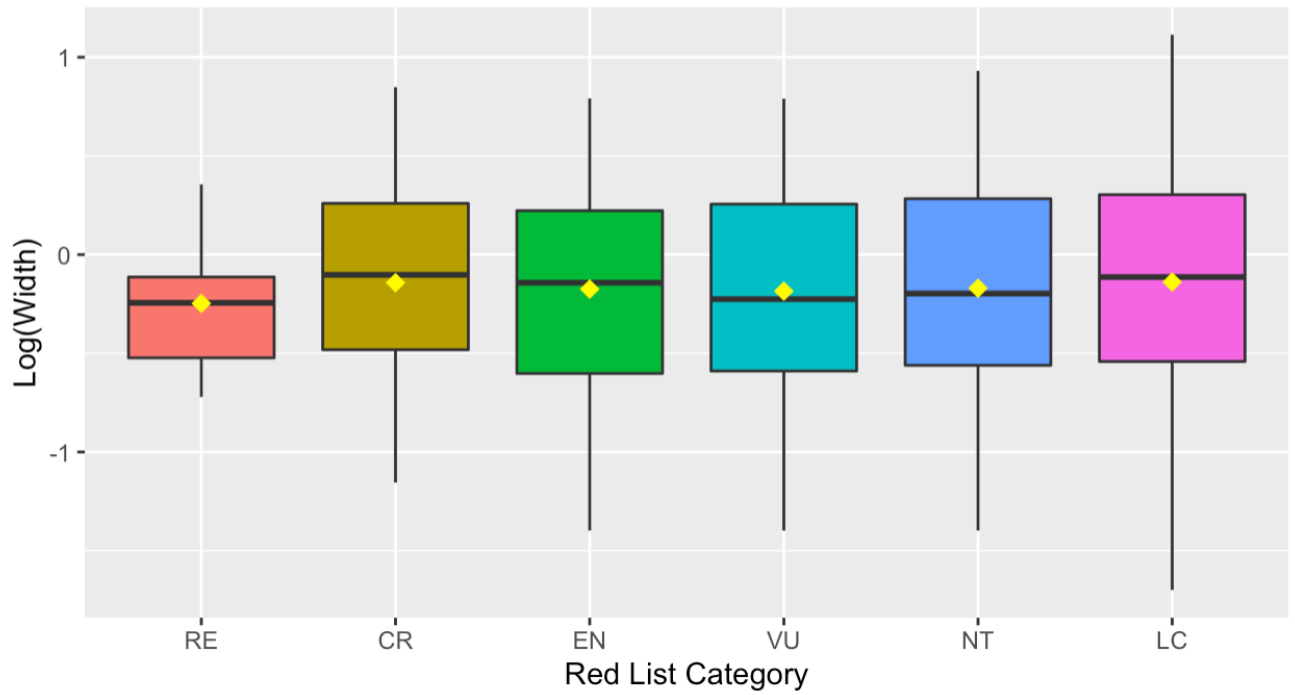

79

80 **Fig. S13** Boxplot of the log leaf width for the Irish flora divided into six extinction risk

81 categories (mean symbol superimposed, yellow diamond)

82

83

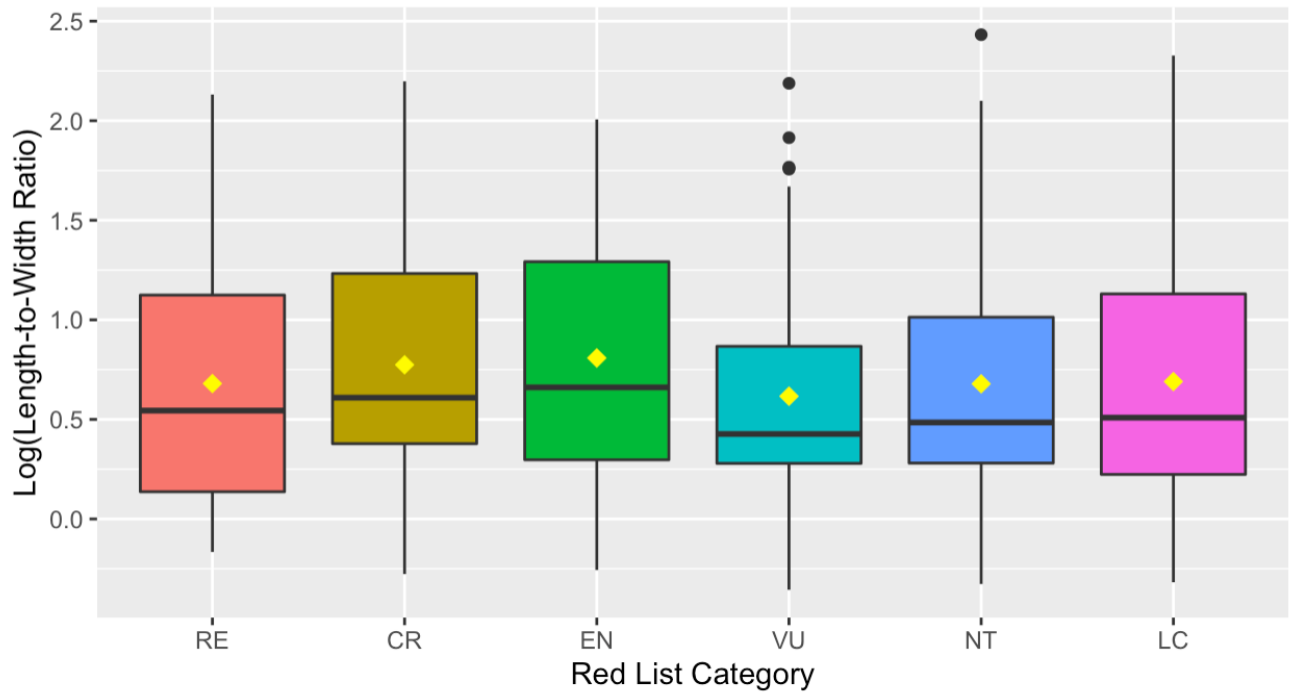

84

85 **Fig. S14** Boxplot of the log leaf length-to-width ratio for the Irish flora divided into six  
86 extinction risk categories (mean symbol superimposed, yellow diamond)



## Regularly spaced-irregularly spaced teeth

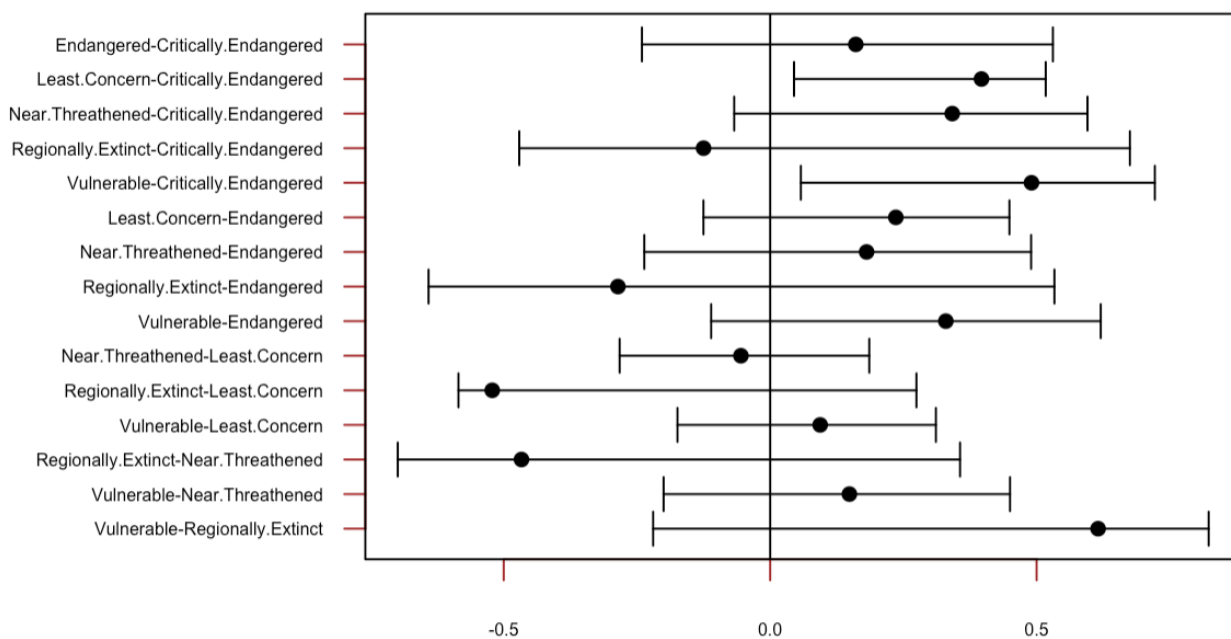

95% confidence intervals for differences in proportions

87

88 **Fig. S15** 95% confidence intervals for the difference in proportions of regularly and

89 irregularly spaced leaf teeth for each Red List category pair

90

## Regularly spaced-no teeth

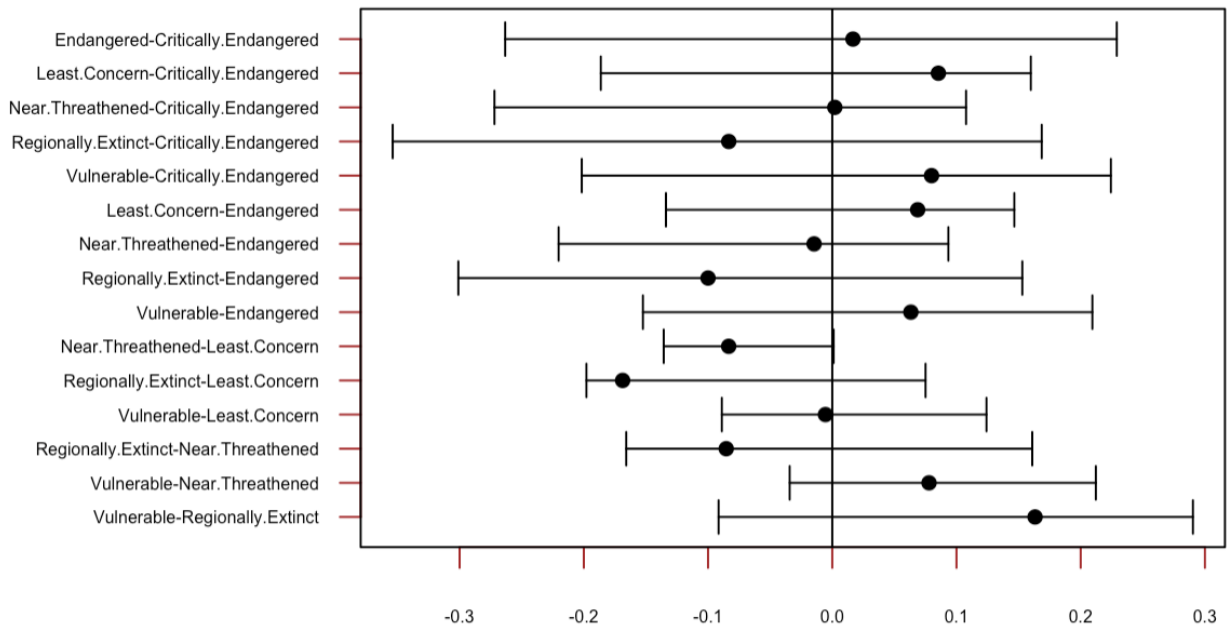

95% confidence intervals for differences in proportions

91

92 **Fig. S16** 95% confidence intervals for the difference in proportions of regularly spaced and

93 no leaf teeth for each Red List category pair

## Irregularly spaced-no teeth

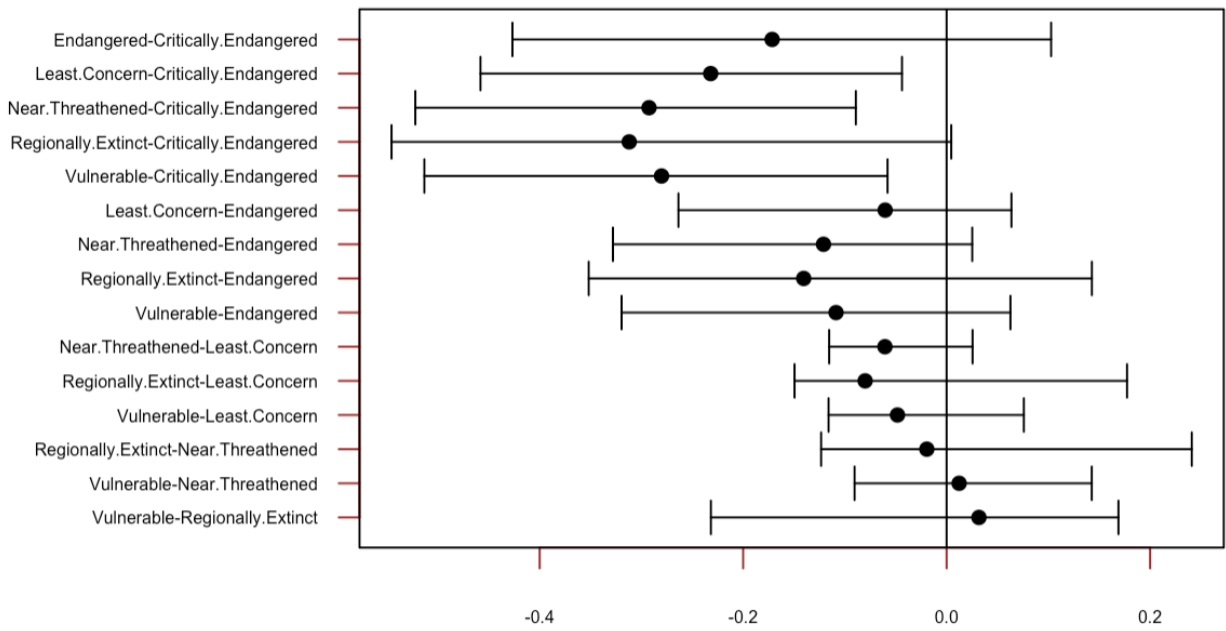

95% confidence intervals for differences in proportions

94

95 **Fig. S17** 95% confidence intervals for the difference in proportions of irregularly spaced and

96 no leaf teeth for each Red List category pair

97

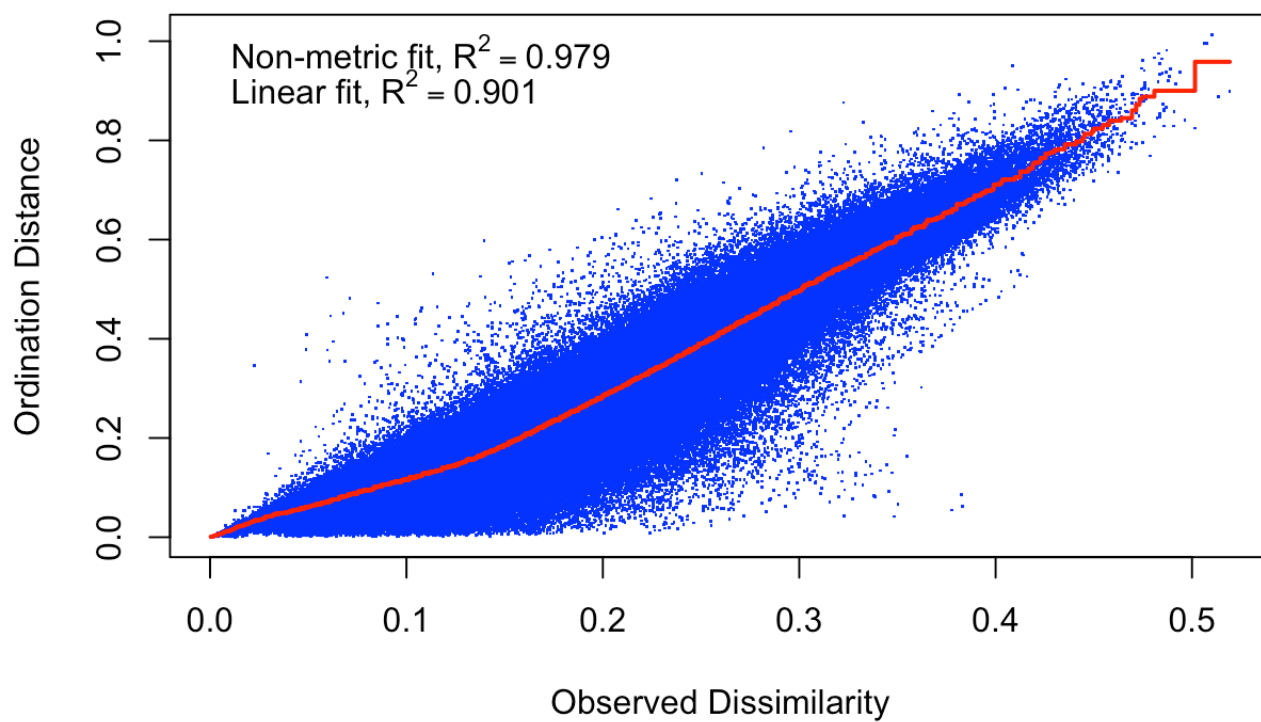

98

99 **Fig. S18** Stressplot for the nMDS ordination of the Irish flora

100

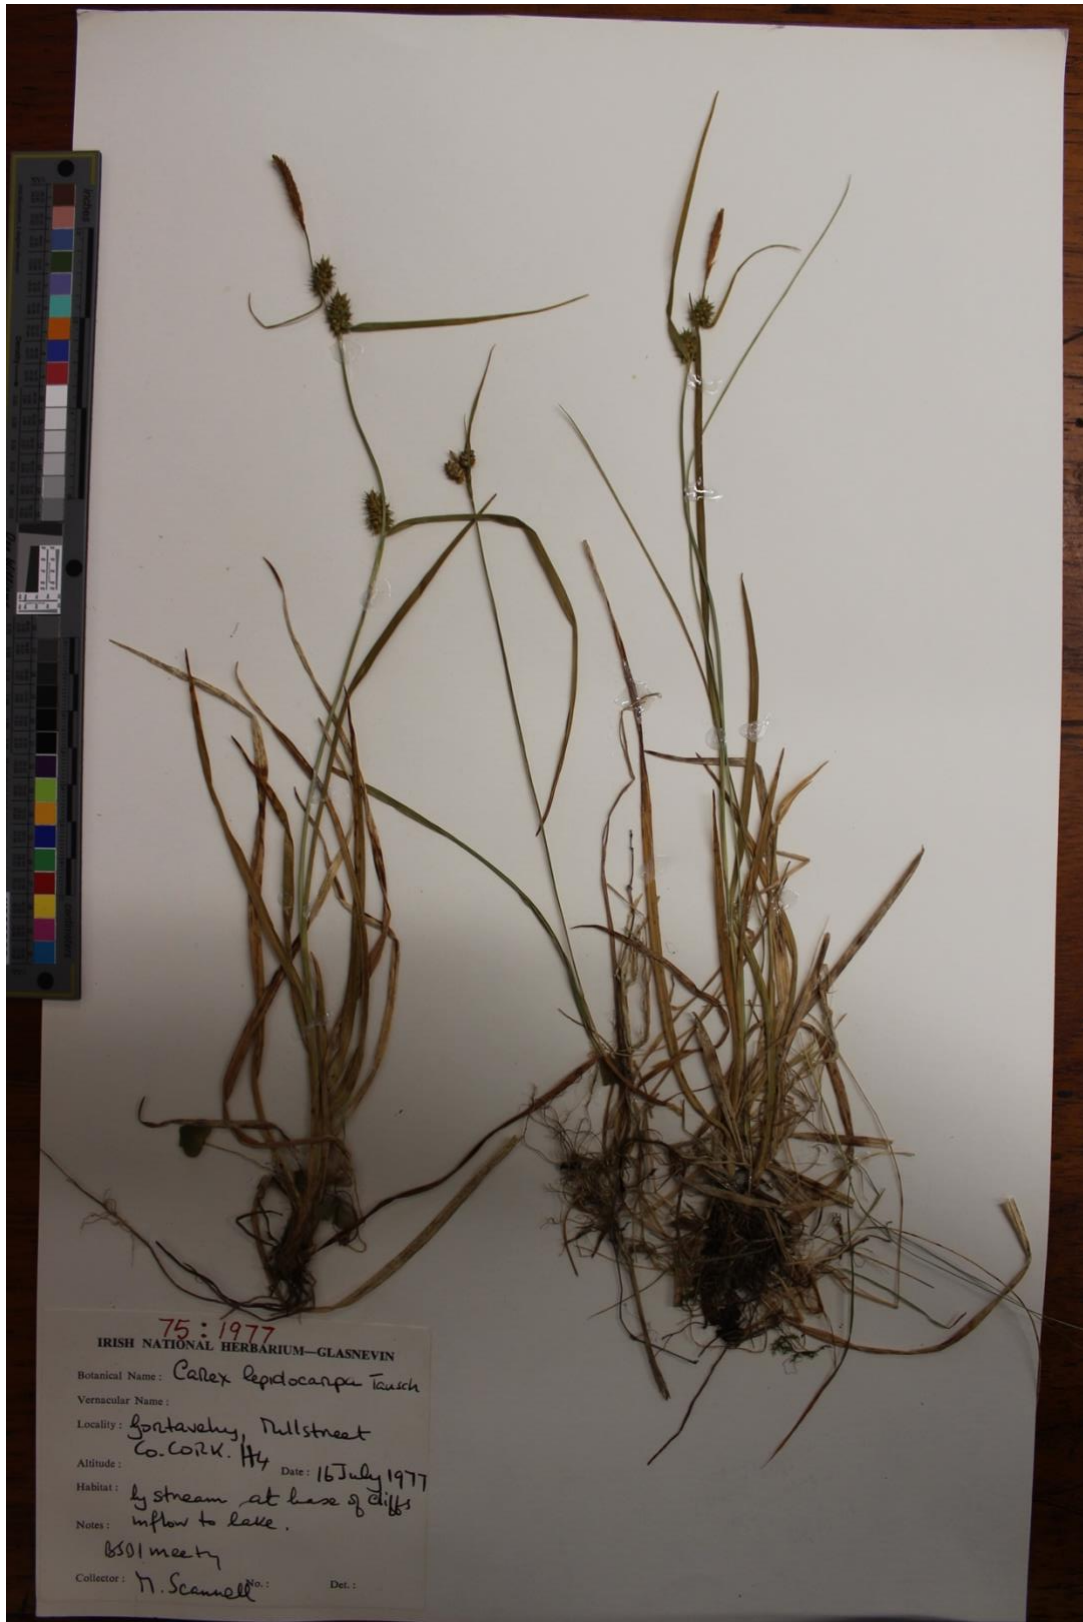

101

102 Fig. S19 *Carex lepidocarpa* subsp. *lepidocarpa* from the National Botanic Gardens, Glasnevin

103

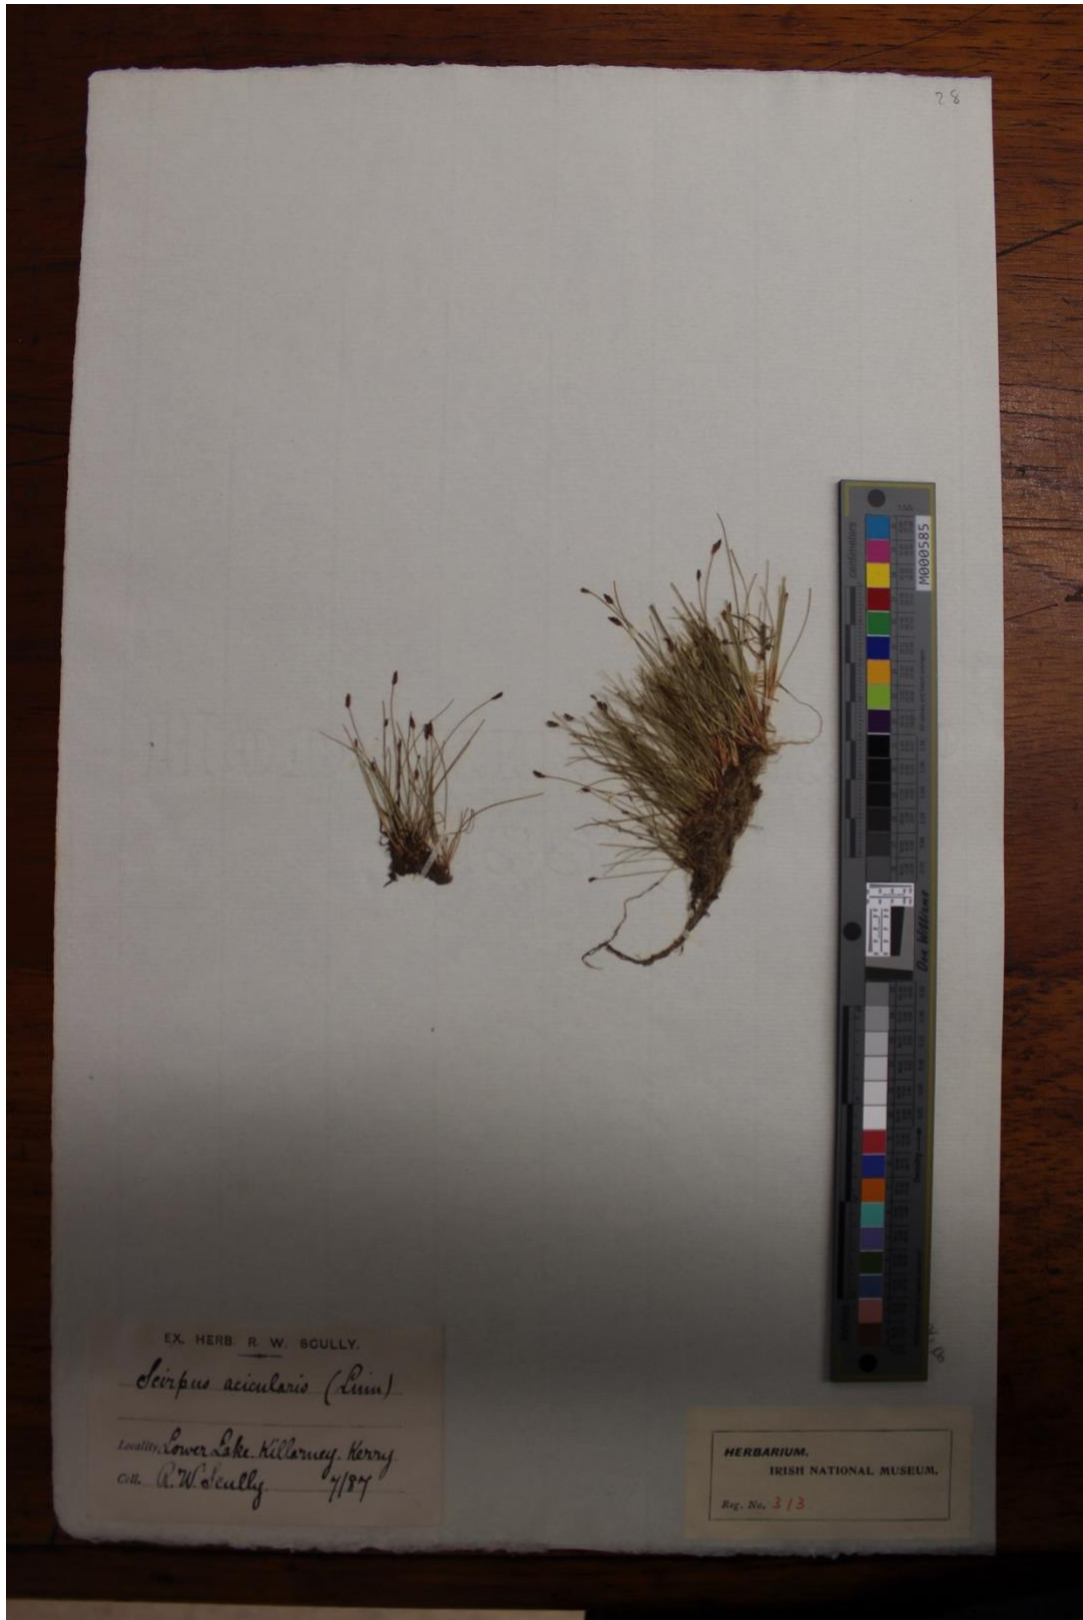

104

105 Fig. S20 *Eleocharis acicularis* from the National Botanic Gardens, Glasnevin

106

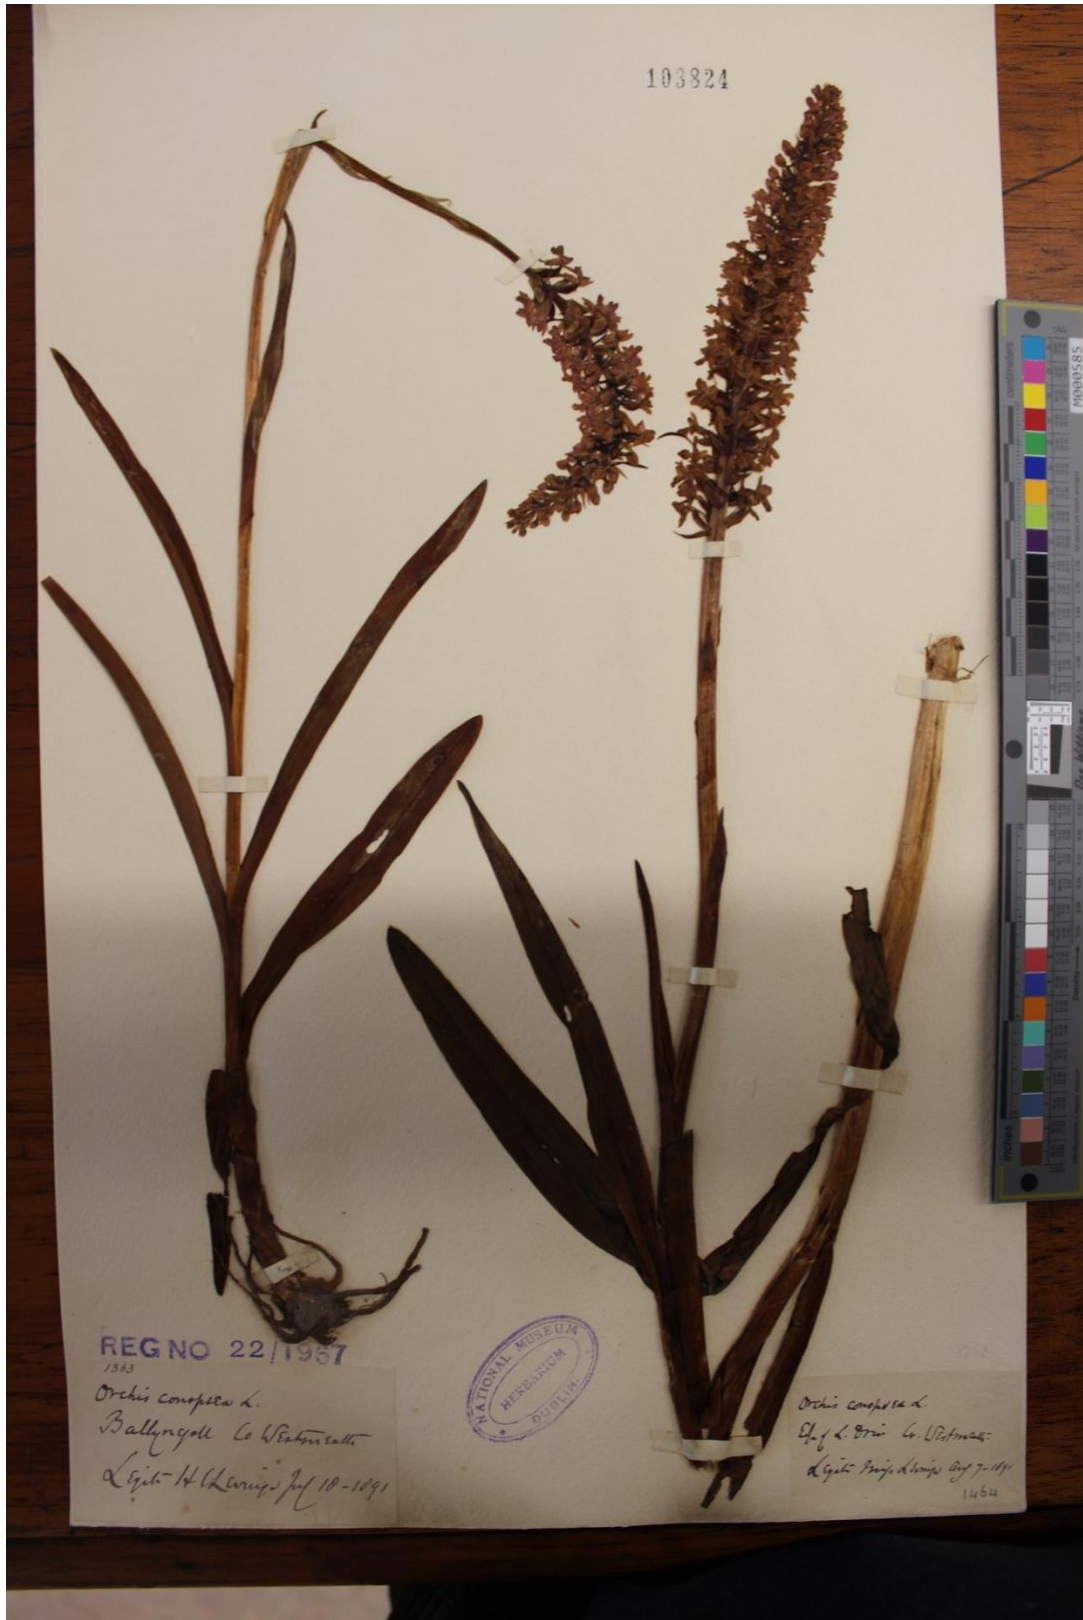

107

108 Fig. S21 *Gymnadenia borealis* from the National Botanic Gardens, Glasnevin

109

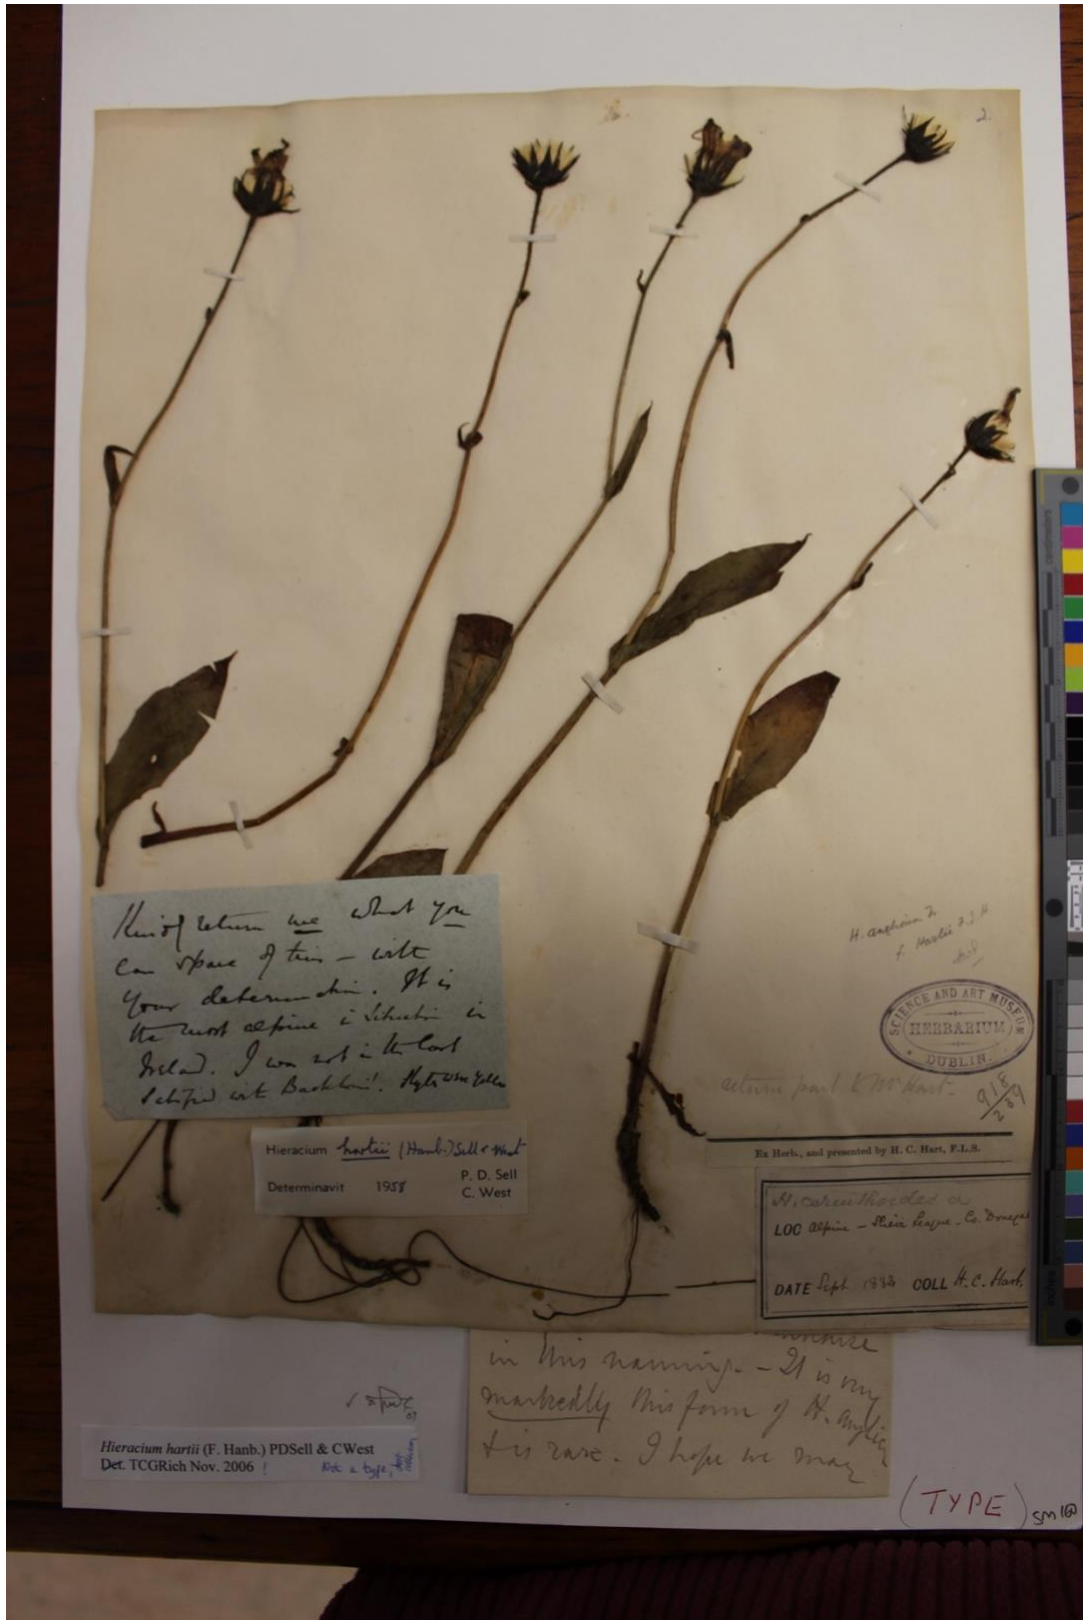

110

111 Fig. S22 *Hieracium hartii* from the National Botanic Gardens, Glasnevin

112



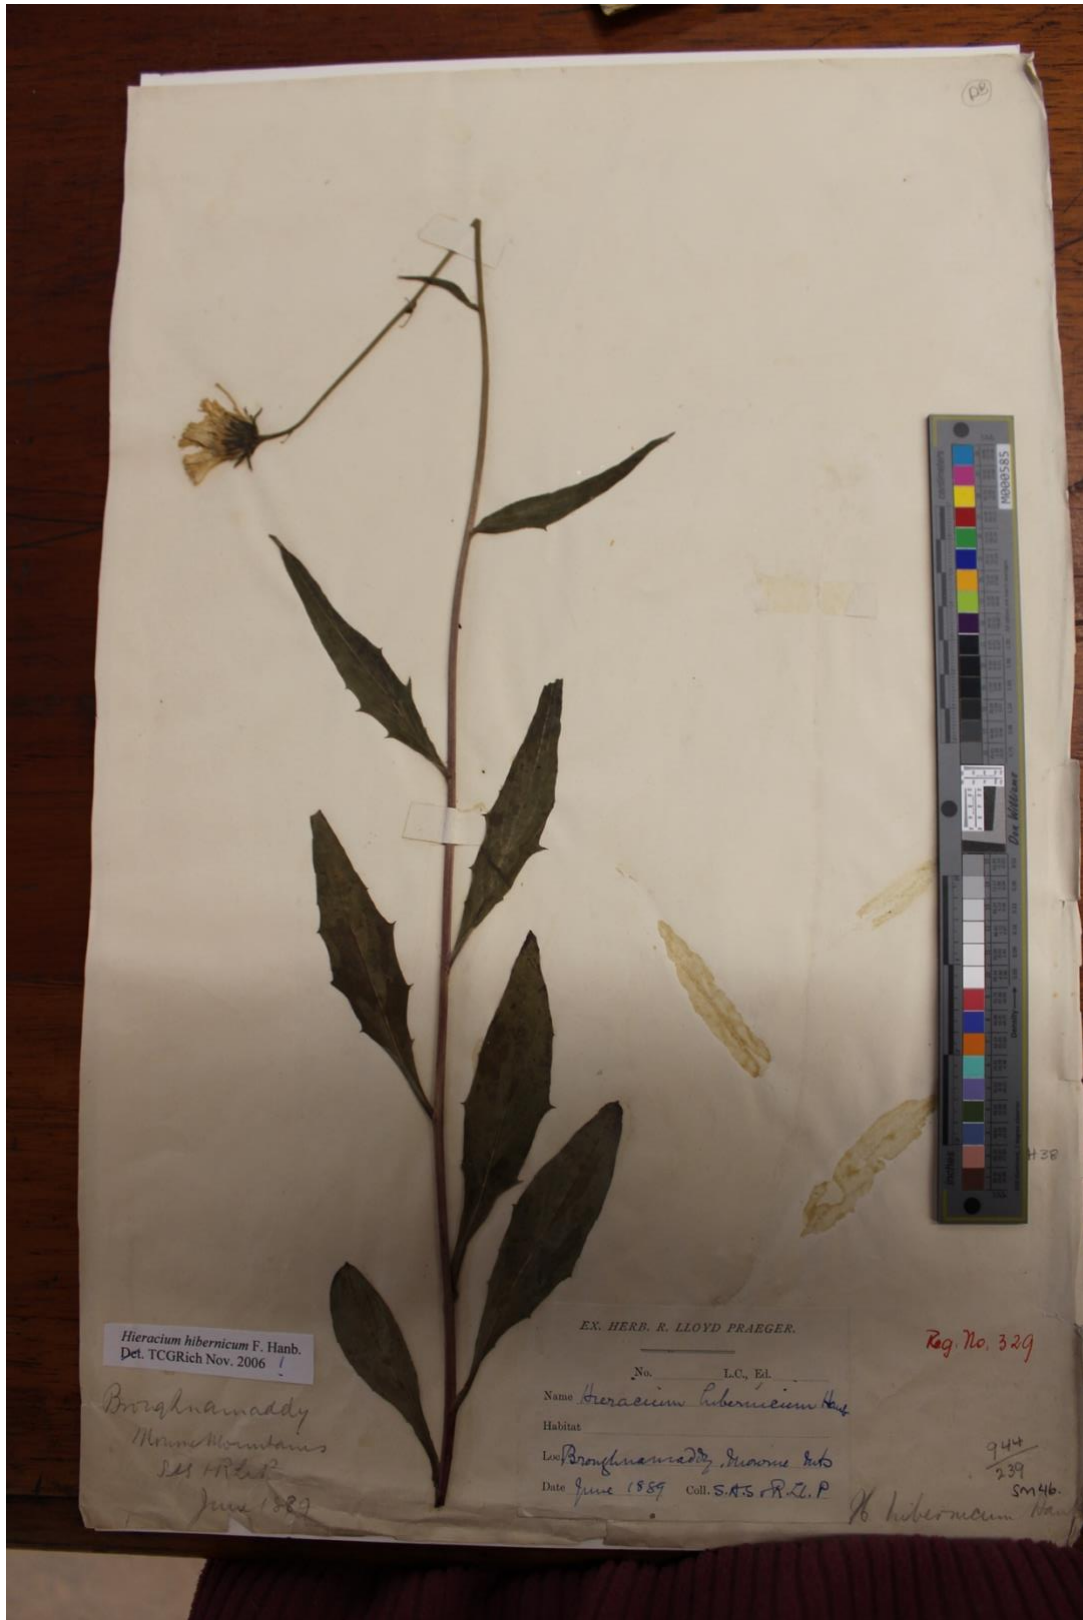

113

114 Fig. S23 *Hieracium hibernicum* from the National Botanic Gardens, Glasnevin

115

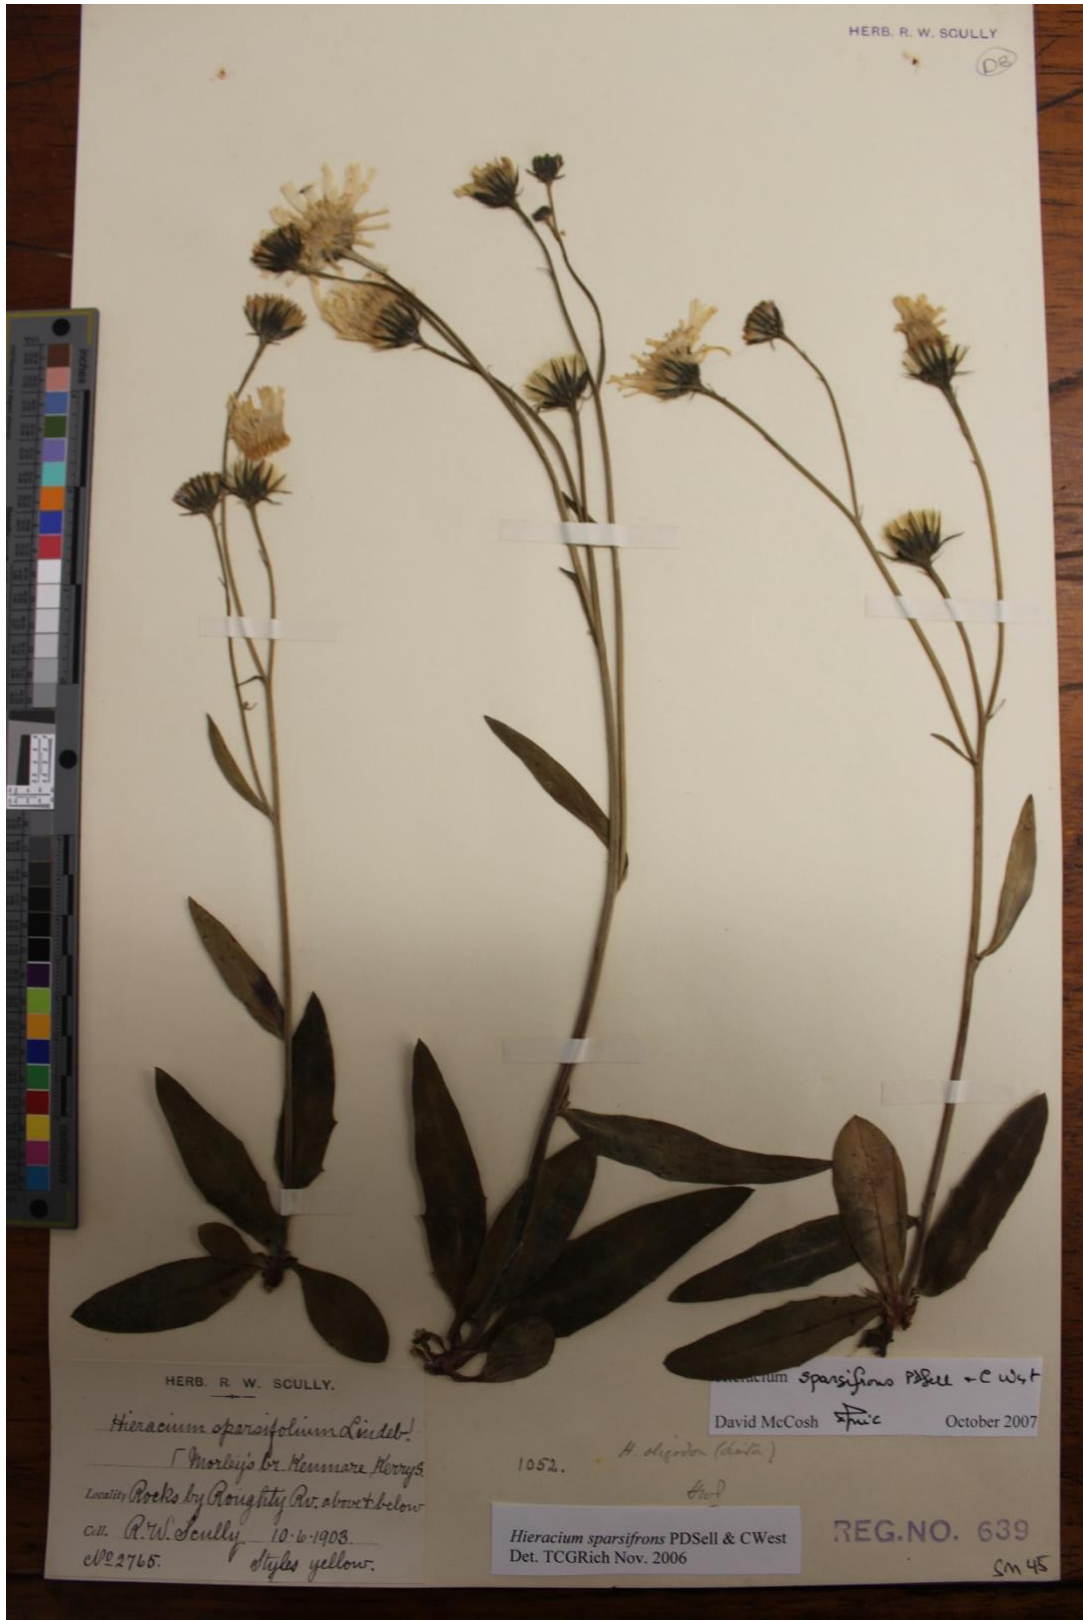

116

117 **Fig. S24** *Hieracium sparsifrons* from the National Botanic Gardens, Glasnevin

118

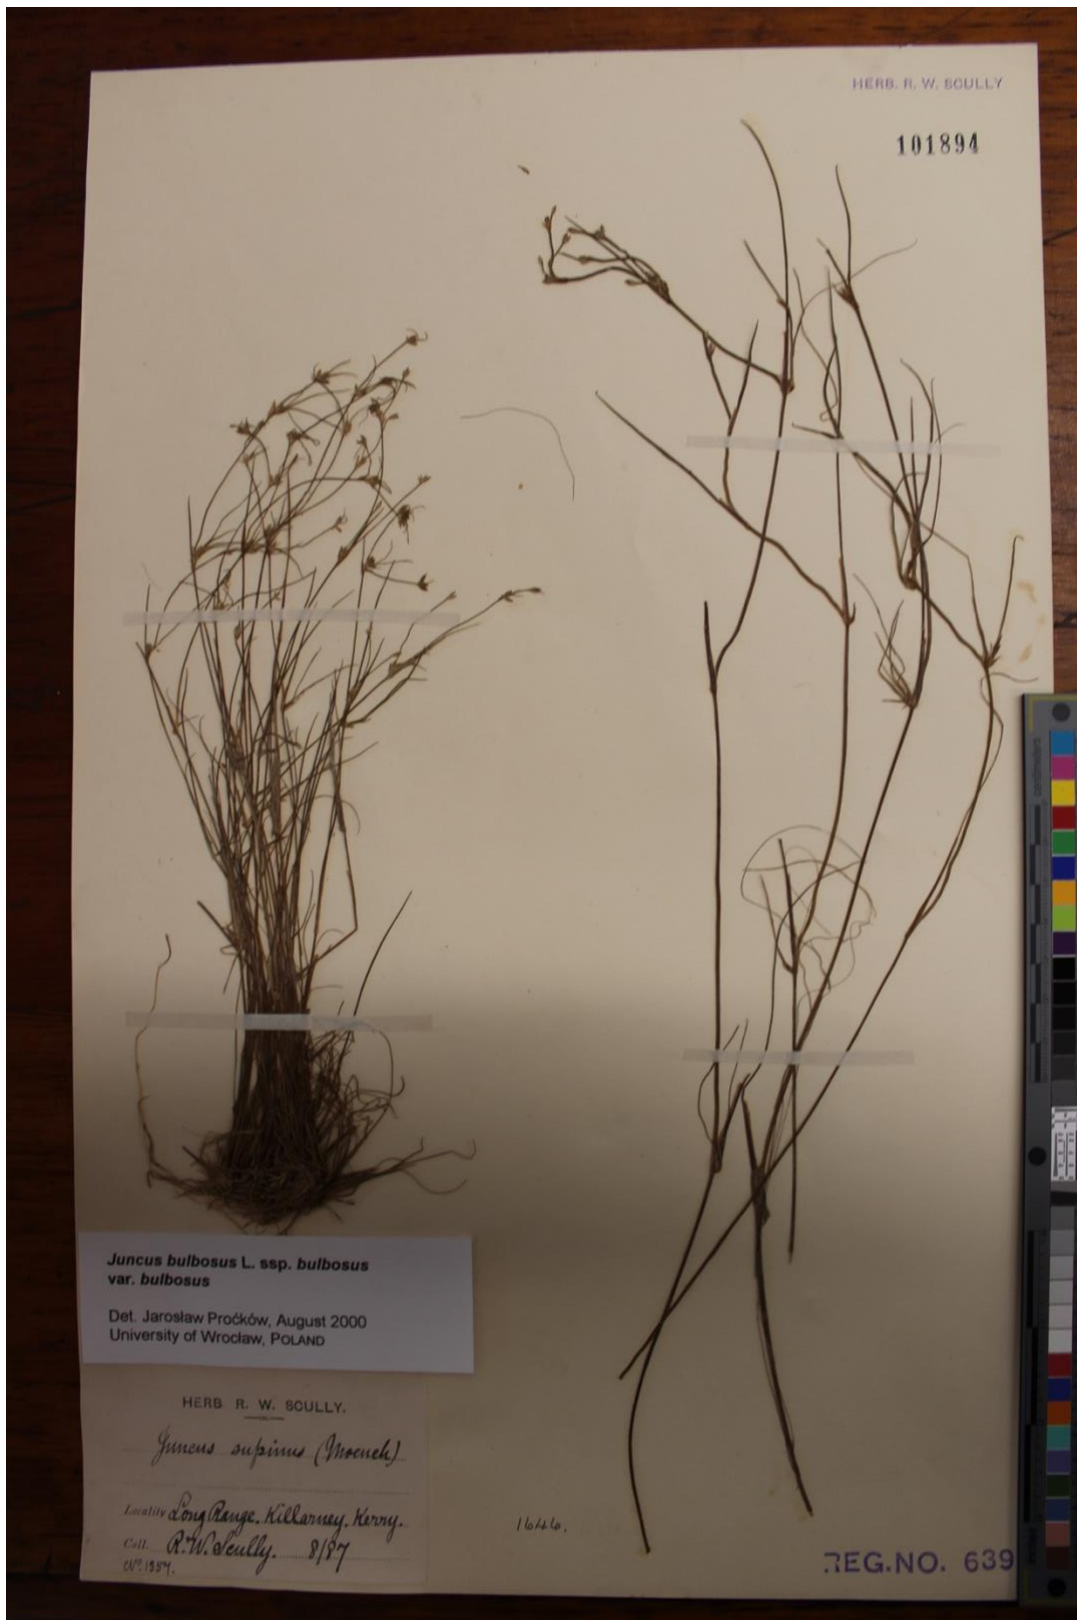

119

120 Fig. S25 *Juncus bulbosus* subsp. *bulbosus* from the National Botanic Gardens, Glasnevin

121

003666

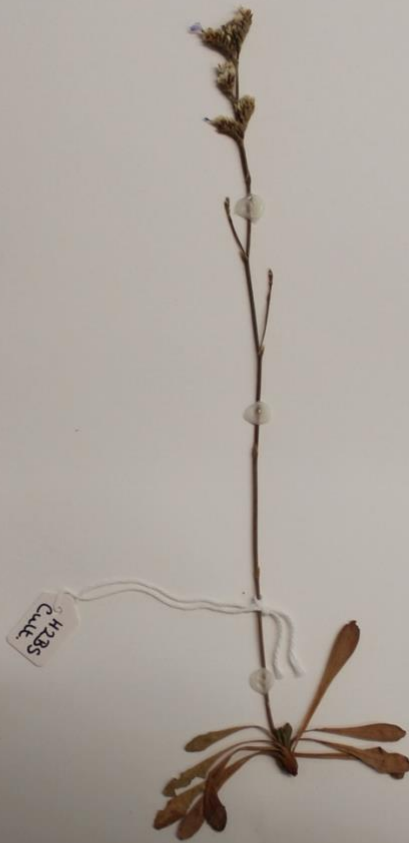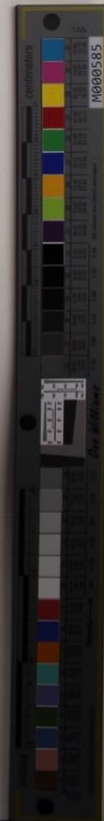

71:1983  
IRISH NATIONAL HERBARIUM—GLASNEVIN  
Botanical Name: *Limonium recurvum* C.E. Salmon  
Vernacular Name: Subsp. *portlandicum* Inghouille  
var. *kerryense* Inghouille.  
Locality: Banna Strand, Co. Kerry  
Altitude: H2 Date: July 1980  
Habitat: between dunes and salt marsh:  
Notes: ISOTYPE: Code H2BS  
Cult. Leicester Sept 1981  
Collector: M.J. Inghouille No.: Det.:

LEICESTER UNIVERSITY HERBARIUM (LTR)  
FLORA OF THE BRITISH ISLES  
LIMONIUM BINERVOSUM (G.E. Sa.) C.E. Salmon  
AGGREGATE  
L. RECURVUM C.E. Salmon  
subsp. PORTLANDICUM Inghouille  
var. KERRYENSE Inghouille  
ISOTYPE  
Between the dunes and salt marsh at Banna  
Strand, N. Kerry, v.c.H2; code H2BS.  
Coll. M.J. Inghouille July 1980  
Cult. at Leicester until September 1981

122

123 Fig. S26 *Limonium recurvum* subsp. *portlandicum* from the National Botanic Gardens,

124 Glasnevin

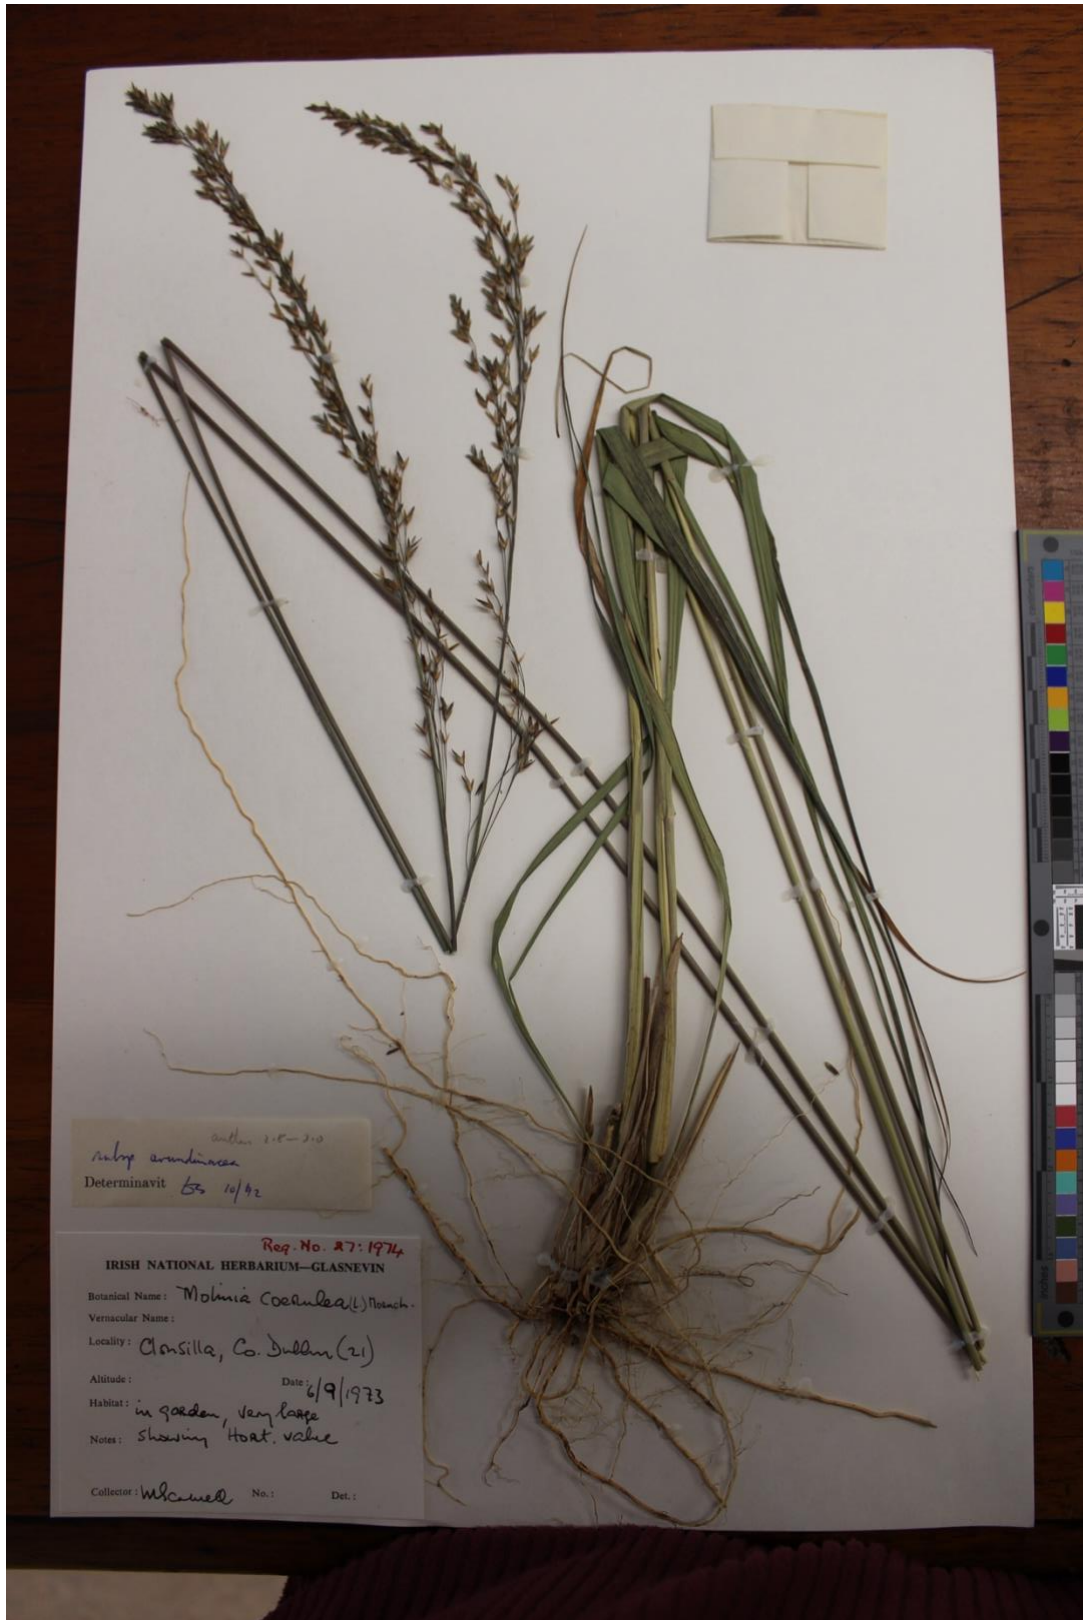

125

126 **Fig. S27** *Molinia caerulea* subsp. *arundinacea* from the National Botanic Gardens, Glasnevin

127

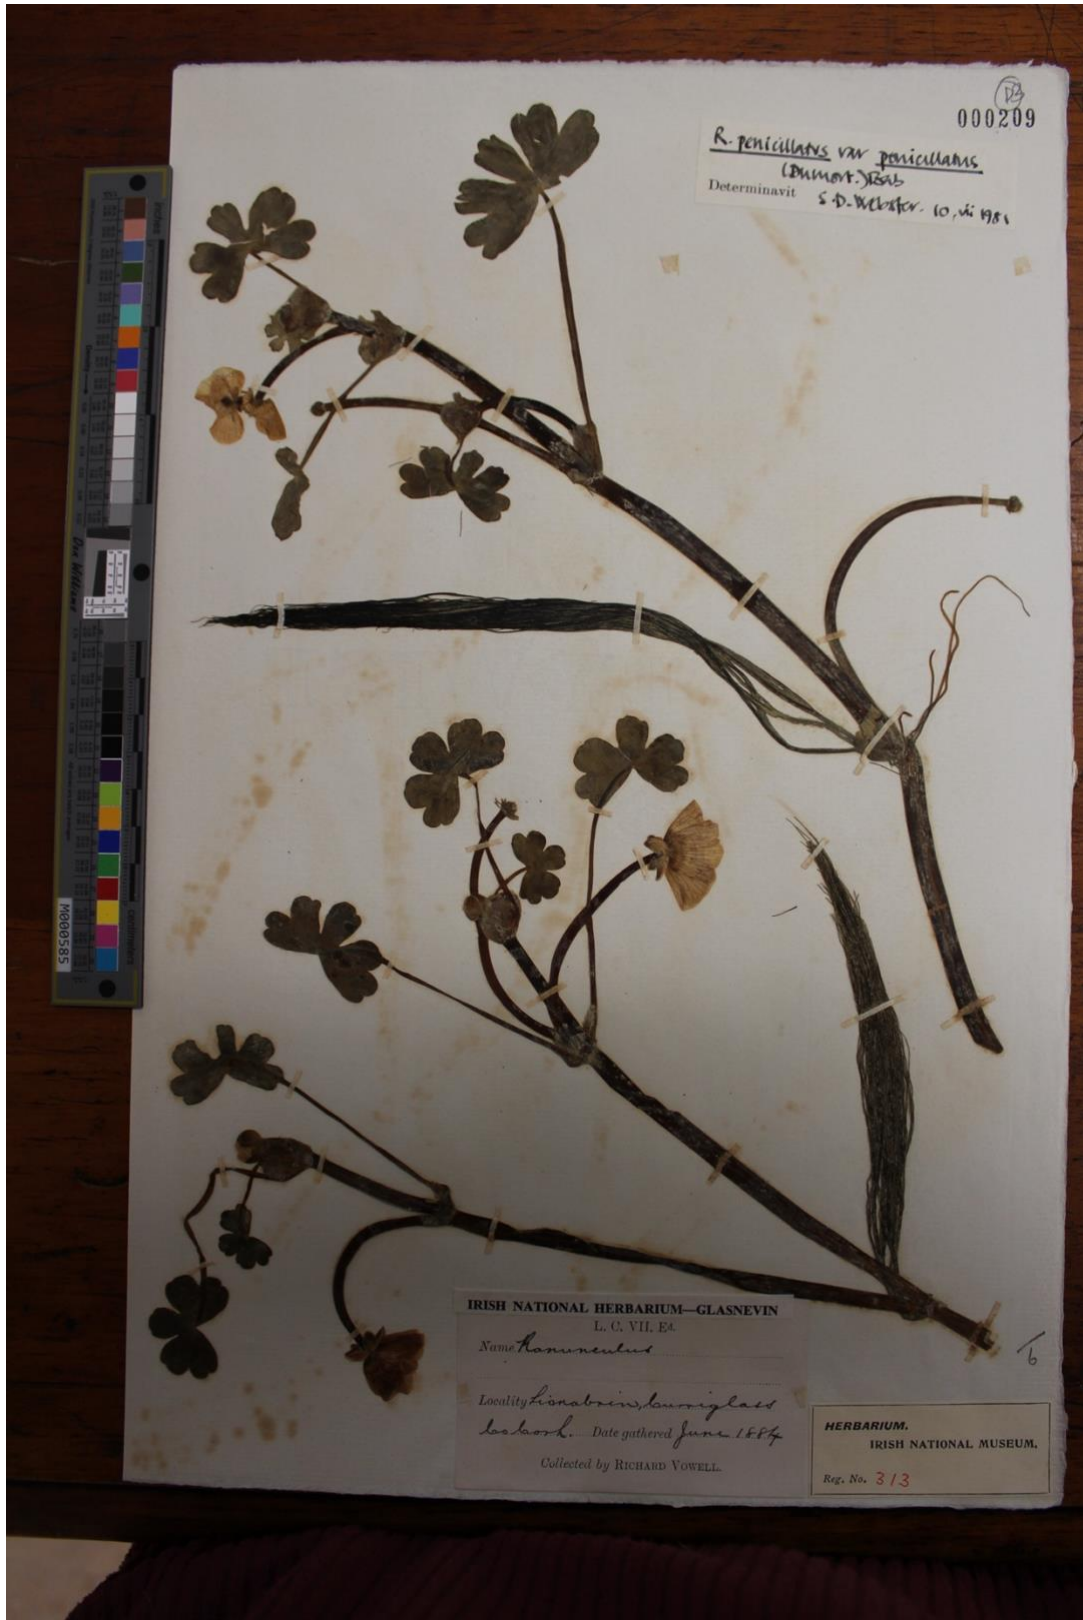

128

129 Fig. S28 *Ranunculus penicillatus* subsp. *penicillatus* from the National Botanic Gardens,

130 Glasnevin

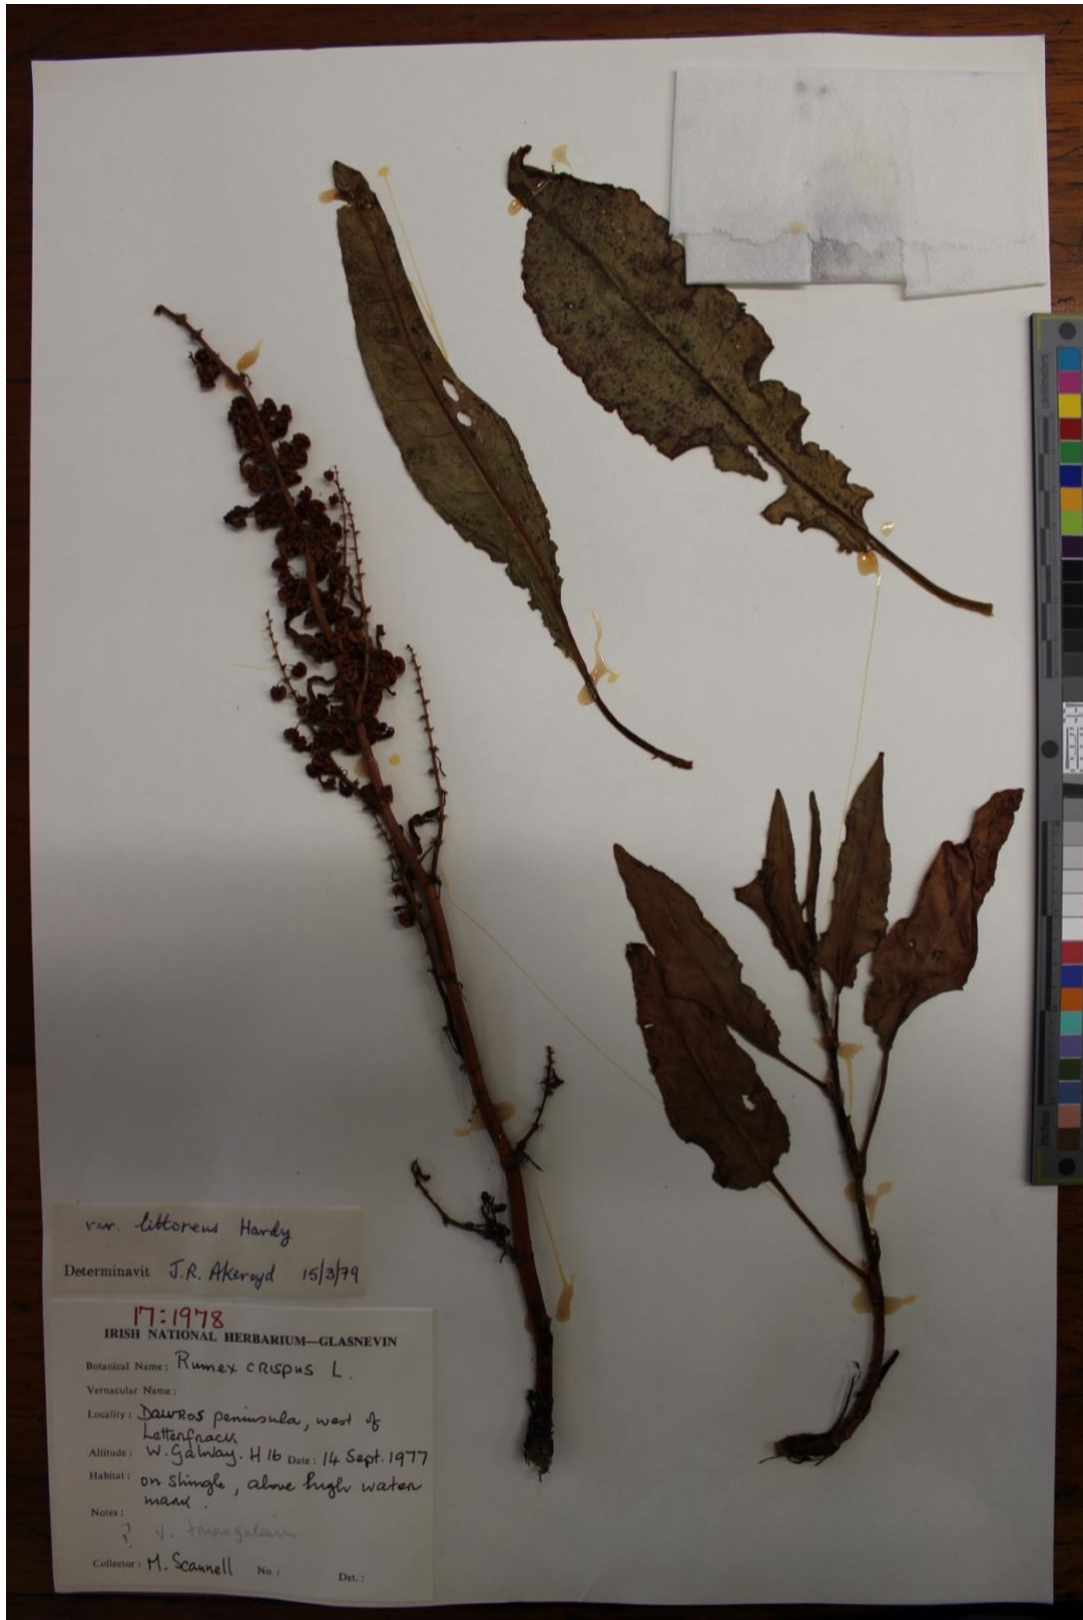

131

132 Fig. S29 *Rumex crispus* subsp. *littoreus* from the National Botanic Gardens, Glasnevin

133

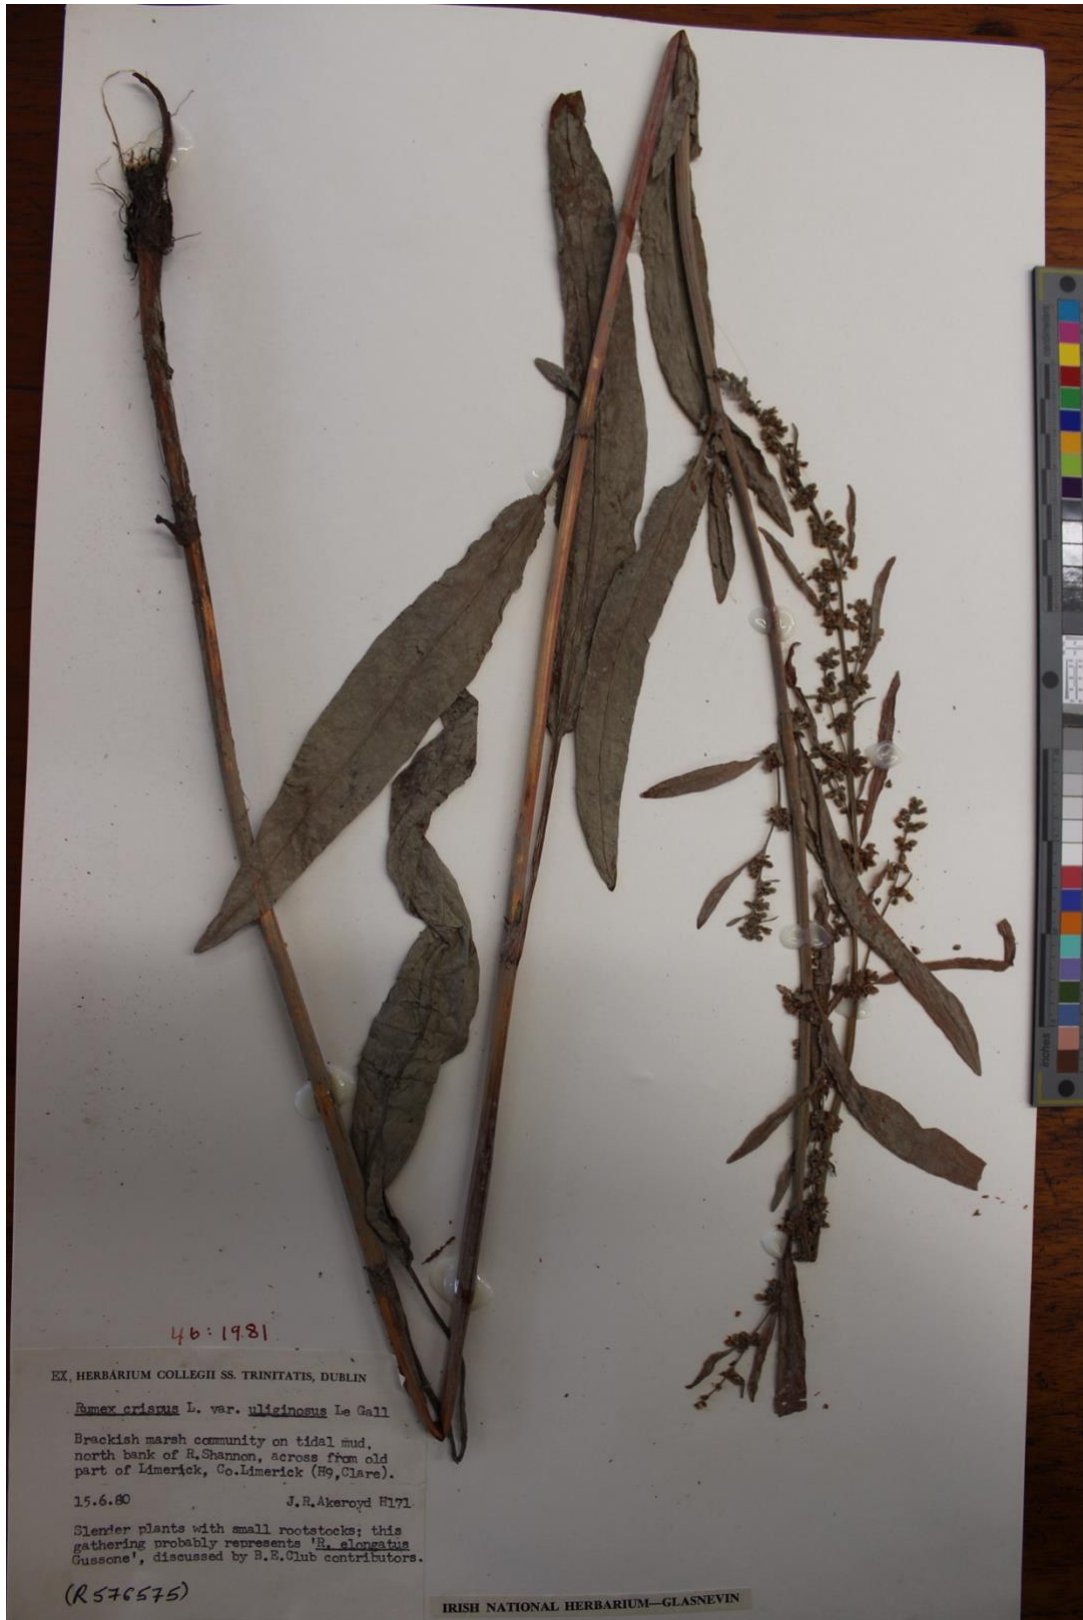

134

135 Fig. S30 *Rumex crispus* subsp. *uliginosus* from the National Botanic Gardens, Glasnevin

136



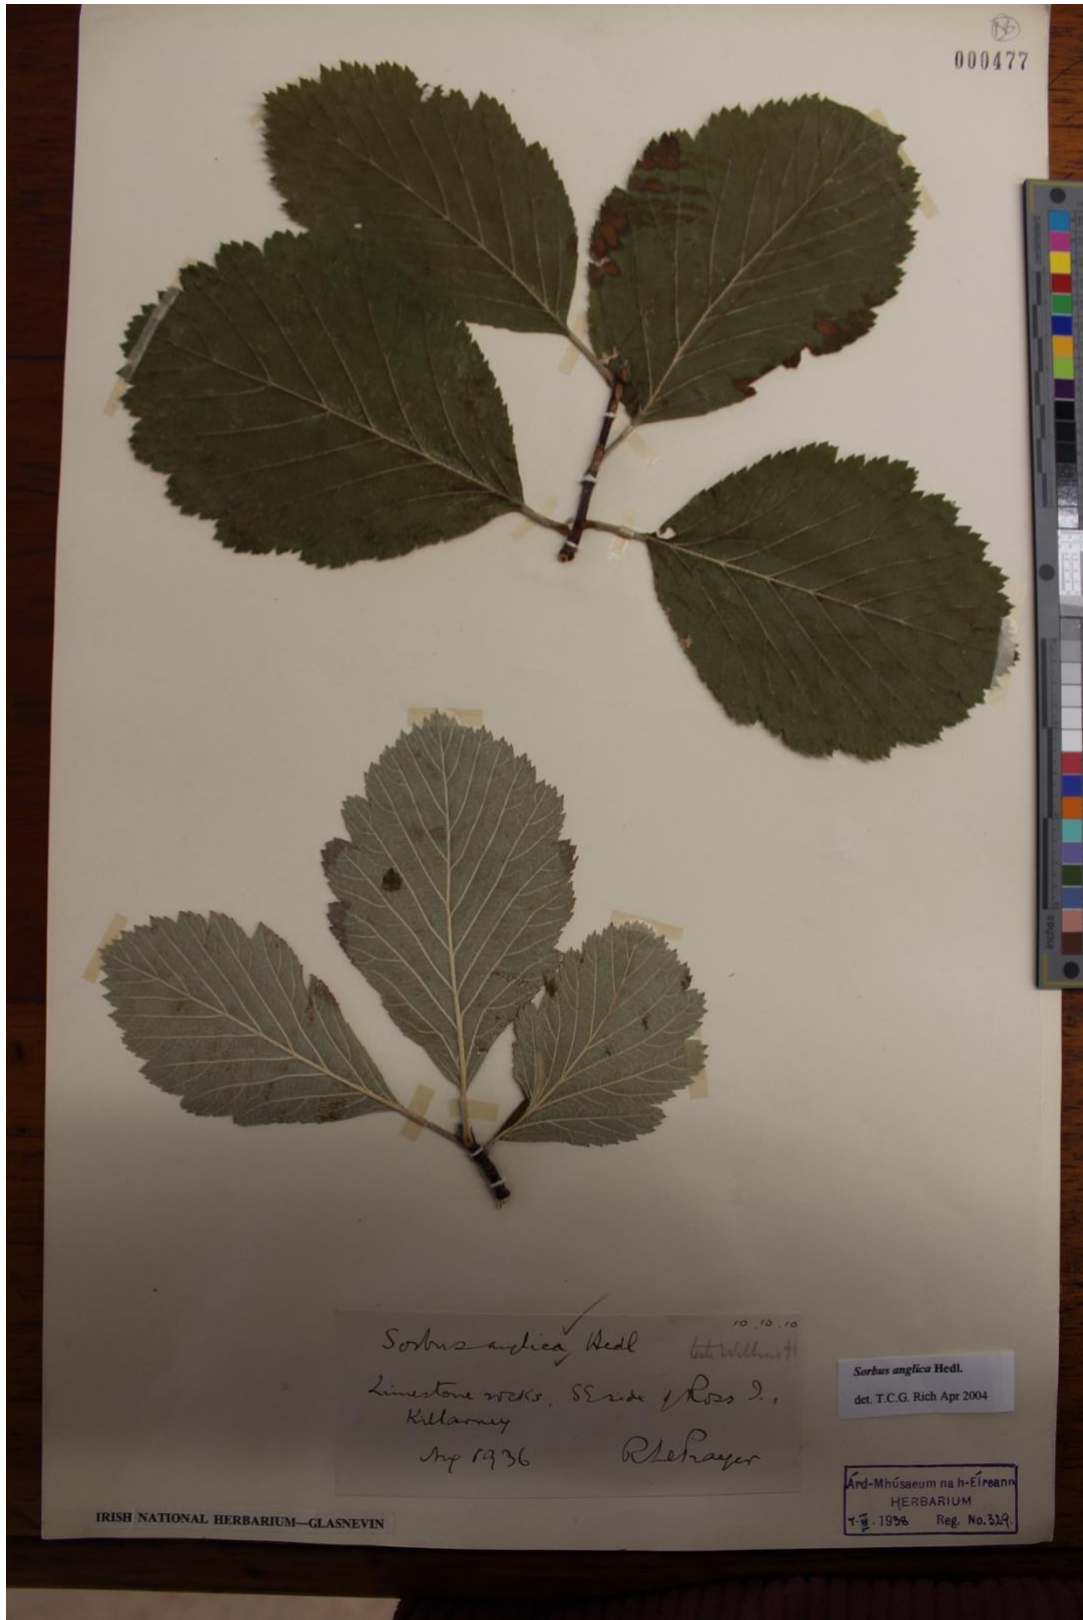

137

138 Fig. S31 *Sorbus anglica* from the National Botanic Gardens, Glasnevin

139

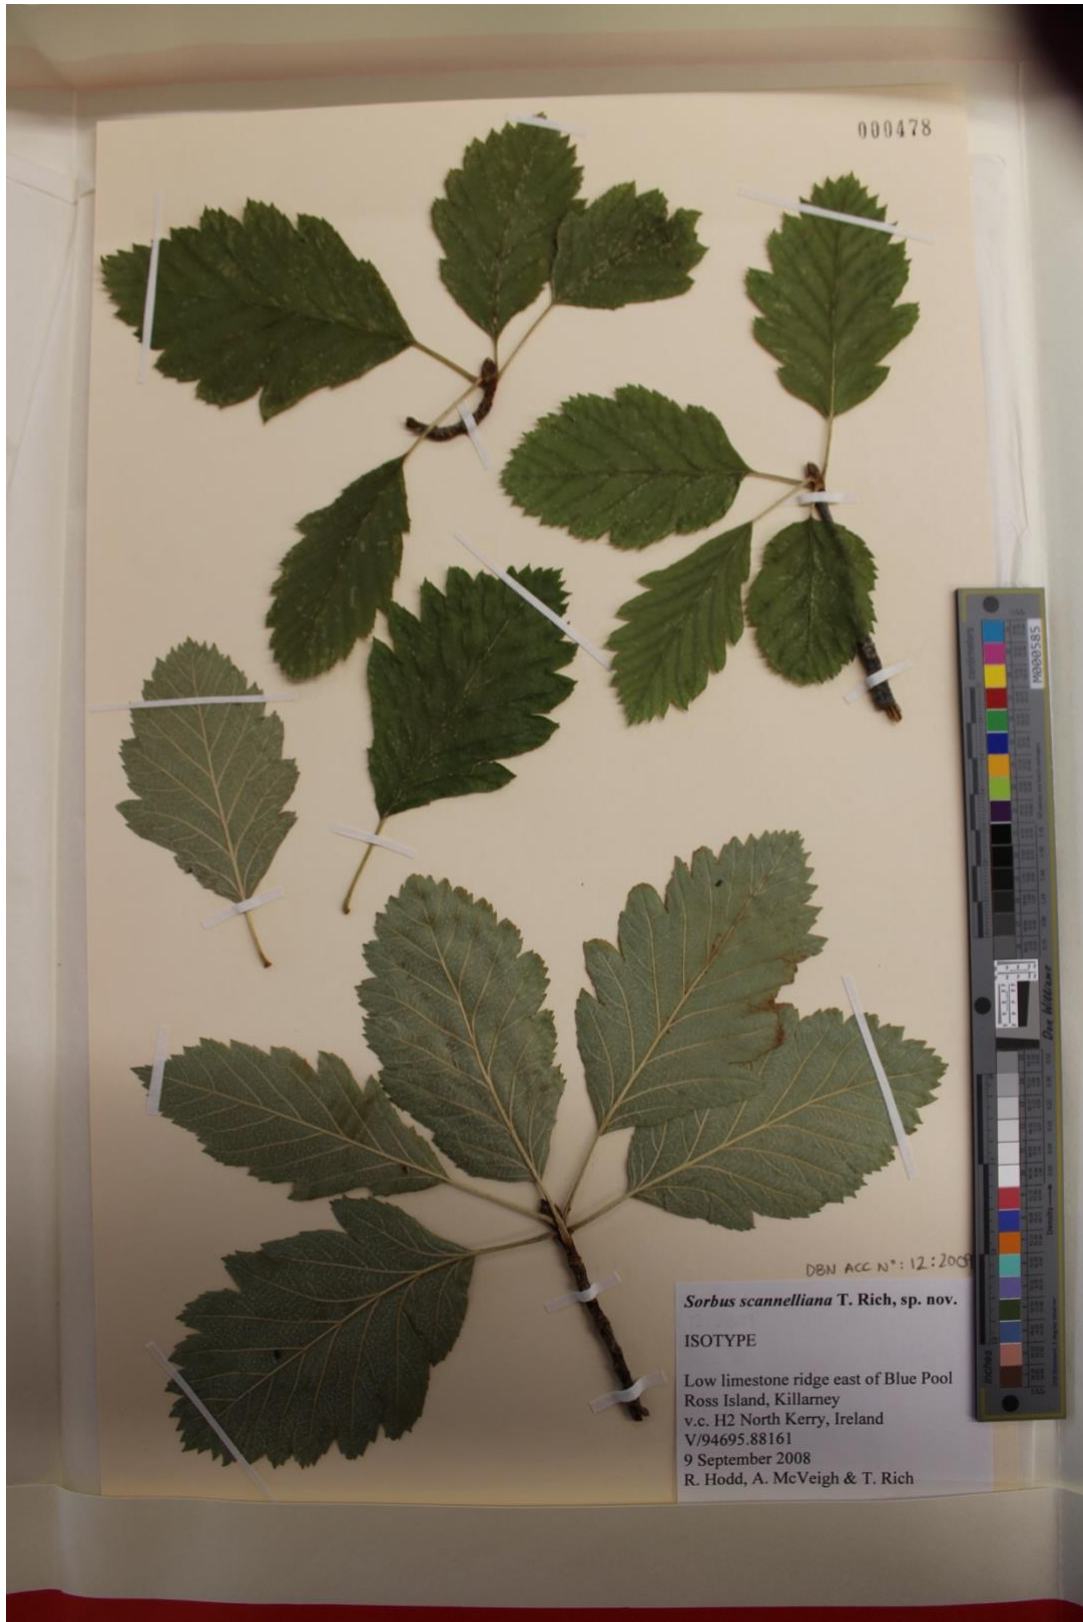

140

141 **Fig. S32** *Sorbus scannelliana* from the National Botanic Gardens, Glasnevin
